# Supplementary material for: Visible-light-promoted N-centered radical generation for remote heteroaryl migration
Source: Royal Society of Chemistry journal article supplement (doi:10.1039/d0ob01594f), 2020-01-01

# Visible-Light-Promoted N-Centered Radical Generation for Remote Heteroaryl Migration

Chengkou Liu,<sup>a</sup> Chen Cai,<sup>a</sup> Chengcheng Yuan,<sup>a</sup> Qiang Jiang,<sup>a</sup> Zheng Fang,<sup>a</sup> and Kai

Guo<sup>\*,a,b</sup>

<sup>a</sup>College of Biotechnology and Pharmaceutical Engineering, Nanjing Tech University,  
Nanjing, 211816 China

<sup>b</sup>State Key Laboratory of Materials-Oriented Chemical Engineering, Nanjing Tech  
University, Nanjing, 211816 China

E-mail: [guok@njtech.edu.cn](mailto:guok@njtech.edu.cn)

## Table of Contents

---

|                                                      |        |
|------------------------------------------------------|--------|
| 1. General Remarks                                   | S2     |
| 2. Synthesis of the Starting Materials and Catalysts | S2-S5  |
| 3. Radical Trapping Experiment                       | S6     |
| 4. References                                        | S7     |
| 5. NMR-Spectra of <b>2</b>                           | S8-S31 |

---

## 1. General Remarks

Reagents: Commercially available reagents and solvents were of reagent grade quality without any further purification. Flash column chromatography was performed using silicycle silica gel (200-300 mesh). Analytical thin-layer chromatography (TLC) was performed on 0.2 mm coated silica gel plates (HSGF 254) and visualized using a UV lamp (254 nm or 365 nm).  $^1\text{H}$  NMR and  $^{13}\text{C}$  NMR were recorded on magnet system 400'54 ascend purchased from Bruker Biospin AG, which were reported in parts per million (ppm) referenced to hydrogen resonances and carbon resonances in the NMR solvent ( $\text{DMSO-}d_6$ ). ESI-MS spectra were recorded on Agilent Q-TOF 6520.

## 2. Synthesis of the Starting Materials and Catalysts

### 2.1 Synthesis of the Starting Materials

1a-1t:

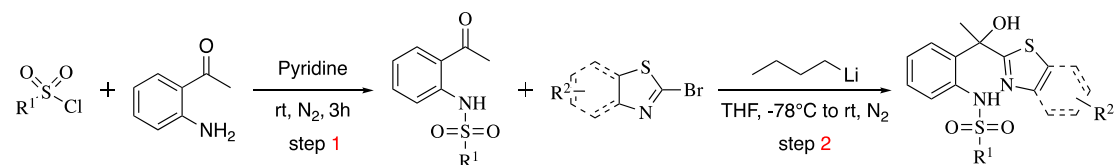

**Step 1**<sup>[1]</sup>:

2-Aminoacetophenone (1 eq, 20 mmol, 2.7014 g) and the corresponding sulfonyl chloride (1.05 eq, 21 mmol) were dissolved in anhydrous pyridine (15 mL) under  $\text{N}_2$ . The reaction mixture was stirred for 3h at ambient temperature. The mixture was diluted with  $\text{CH}_2\text{Cl}_2$  (150 mL), which was washed with HCl solution (3%, 150 mL  $\times$  2) and

water (150 mL). The separated organic layer was dried over anhydrous  $\text{Na}_2\text{SO}_4$  and filtered. The filtrate was concentrated under reduced pressure to give the crude product, which was purified by column chromatographic on silica gel (200-300 mesh, eluent: petroleum ether/ethyl acetate 20:1).

### Step 2<sup>[2]</sup>:

To a stirred solution of the corresponding brominated heterocycle (15 mmol, 1.5 eq) in anhydrous THF (35 mL) was added *n*-butyllithium (15 mmol, 6 mL, 2.5 M, 1.5 eq) dropwise at  $-78^\circ\text{C}$  under  $\text{N}_2$ . After stirred for 0.5 h, the solution of sulfonamide (10 mmol, 1 eq) in anhydrous THF (30 mL) was added dropwise to the mixture. The mixture was stirred for another 2h at  $0^\circ\text{C}$  and quenched with saturated aq.  $\text{NH}_4\text{Cl}$  (100 mL). The aqueous layer was extracted with EA (120 mL) for 2 times. The separated organic layer was dried over anhydrous  $\text{Na}_2\text{SO}_4$  and filtered. The filtrate was concentrated under reduced pressure to give the crude product, which was purified by column chromatographic on silica gel (200-300 mesh).

1u-1w:

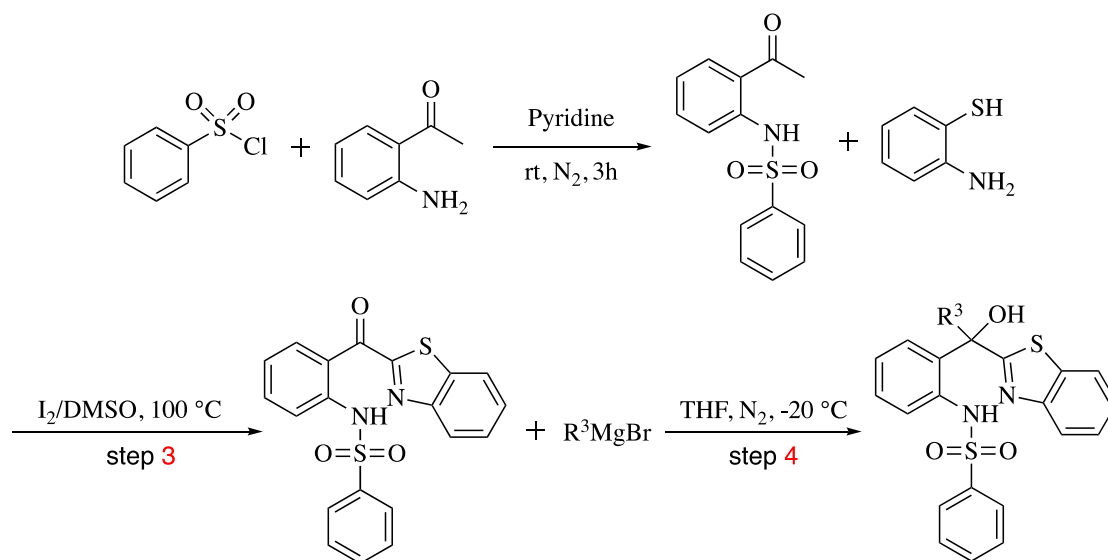

**Step 3<sup>[3]</sup>:**

*N*-(2-acetylphenyl)benzenesulfonamide (10 mmol, 2.7506 g, 1 eq), 2-aminobenzethiol (12 mmol, 1.5004 g, 1.2 eq) and iodine (15 mmol, 3.8072 g, 1.5 eq) were dissolved in DMSO (15 mL). The mixture was stirred for 1h at 100 °C (temperature of the oil bath) and quenched with saturated aq. Na<sub>2</sub>SO<sub>3</sub> (150 mL). The aqueous layer was extracted with EA (150 mL) for 2 times. The separated organic layer was dried over anhydrous Na<sub>2</sub>SO<sub>4</sub> and filtered. The filtrate was concentrated under reduced pressure to give the crude product, which was purified by column chromatographic on silica gel (200-300 mesh, eluent: petroleum ether/ethyl acetate 18:1).

**Step 4<sup>[4]</sup>:**

To a stirred solution of the *N*-(2-(benzo[*d*]thiazole-2-carbonyl)phenyl)benzenesulfonamide (3 mmol, 1.1821 g, 1.0 eq) in anhydrous THF (15 mL) was added dropwise the corresponding Grignard reagent (3.3 mmol, 1.1 eq) at -20°C. The mixture was stirred for 2h and quenched with saturated aq. NH<sub>4</sub>Cl (100 mL). The aqueous layer was extracted with EA (120 mL) for 2 times. The separated organic layer was dried over anhydrous Na<sub>2</sub>SO<sub>4</sub> and filtered. The filtrate was concentrated under reduced pressure to give the crude product, which was purified by column chromatographic on silica gel (200-300 mesh).

## 2.2 Synthesis of the Catalysts<sup>[5]</sup>

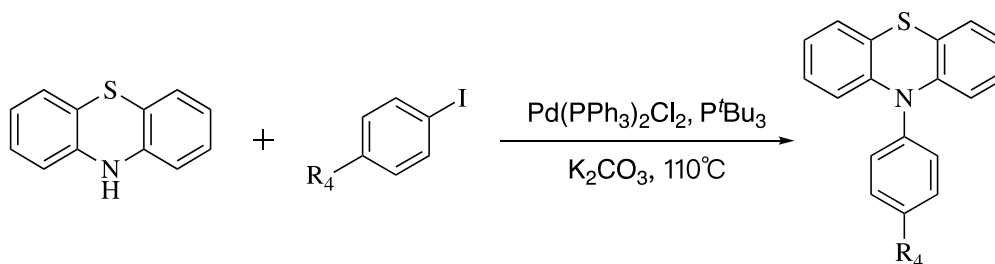

The corresponding iodine benzene (3 mmol, 1eq), phenothiazine (1.1 eq, 3.3 mmol, 656.9 mg), K<sub>2</sub>CO<sub>3</sub> (3 eq, 9 mmol, 1243.9 mg), Pd(PPh<sub>3</sub>)<sub>2</sub>Cl<sub>2</sub> (0.03 eq, 0.09 mmol, 63.2 mg) and P<sup>t</sup>Bu<sub>3</sub> (0.11 mmol, 66.8 mg) were added to a dry Schlenk tube. The flask was evacuated and backfilled with pure N<sub>2</sub> for 3 times. Then anhydrous toluene (10 mL) was added. The mixture was stirred at 110°C (temperature of the oil bath) for 24h and quenched with saturated aq. NH<sub>4</sub>Cl (150 mL). The aqueous layer was extracted with EA (150 mL). The separated organic layer was dried over anhydrous Na<sub>2</sub>SO<sub>4</sub> and filtered. The filtrate was concentrated under reduced pressure to give the crude product, which was purified by column chromatographic on silica gel (200-300 mesh).

### 3. Radical trapping experiment

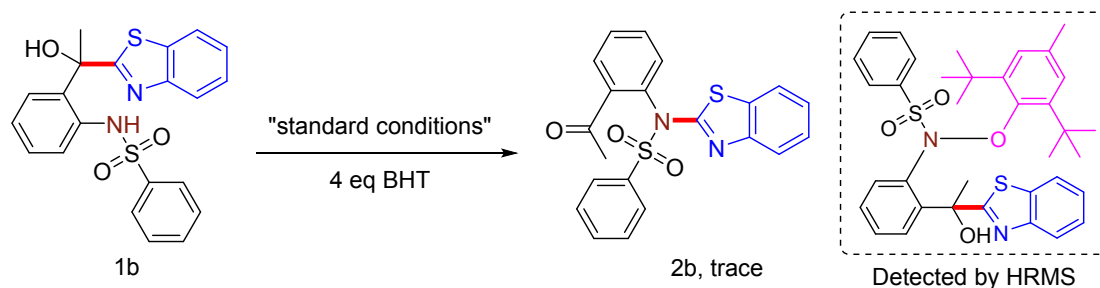

An oven-dried 10 mL reaction tube equipped with a magnetic stir bar was charged with substrate 1b (0.3 mmol, 123.0 mg), PC 1 (0.015 mmol, 4.1 mg),  $\text{Ag}_2\text{CO}_3$  (0.75 mmol, 206.8 mg),  $\text{KH}_2\text{PO}_4$  (0.9 mmol, 122.5 mg) and BHT (1.2 mmol, 264.4 mg). Then, the tube was evacuated and backfilled with nitrogen (three times). Subsequently, 1,4-dioxane (3 mL) was injected into the tube under a nitrogen atmosphere. The reaction mixture was stirred under the irradiation of a 60 W blue LED at 60 °C for 48 h. And, the corresponding radical-trapping intermediate was detected by HRMS-ESI (Calcd for  $\text{C}_{36}\text{H}_{41}\text{N}_2\text{O}_4\text{S}_2$   $[\text{M}+\text{H}]^+$ : 629.2502; found: 629.2522.  $\text{C}_{36}\text{H}_{40}\text{N}_2\text{O}_4\text{S}_2\text{Na}$   $[\text{M}+\text{Na}]^+$ : 651.2322; found: 651.2345. Fig. S1).

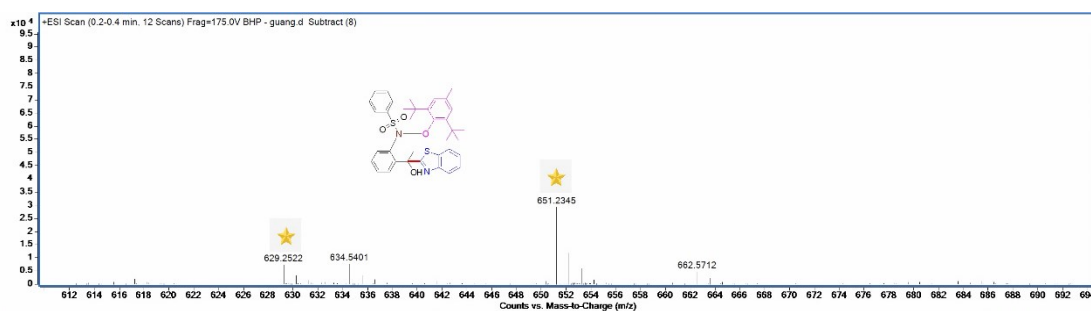

Fig. S1 HRMS (ESI) analysis of BHT trapping intermediate

## 4. References

- [1] Youn, S. W.; Ko, T. Y.; Jang, Y. H. Palladium-catalyzed regioselective synthesis of 3-arylindoles from N-Ts-anilines and styrenes. *Angew. Chem., Int. Ed.*, **2017**, *56*, 6636-6640.
- [2] Shah, M.; Wells, G.; Bradshaw, T. D.; Laughton, C. A.; Stevens, M. F. G.; Westwell, A. D. Antitubercular properties of substituted hydroxycyclohexadienones. *Lett. Drug Des. Discov.*, **2006**, *3*, 419-423.
- [3] Zhu, Y.-P.; Lian, M.; Jia, F.-C.; Liu, M.-C.; Yuan, J.-J.; Gao, Q.-H.; Wu, A.-X. I<sub>2</sub> promoted domino oxidative cyclization for one-pot synthesis of 2-acylbenzothiazoles via metal-free sp<sup>3</sup> C-H functionalization. *Chem. Commun.*, **2012**, *48*, 9086-9088.
- [4] Sumrit, P.; Chuawong, P.; Nanok, T.; Duangthongyou, T.; Hormnirun, P. Aluminum complexes containing salicylbenzoxazole ligands and their application in the ring-opening polymerization of rac-lactide and  $\epsilon$ -caprolactone. *Dalton Trans.*, **2016**, *45*, 9250-9266.
- [5] Zhou, J.; Hong, C.; Pan, C. The photo-controlled polymerization-induced self-assembly and reorganization process for fabrication of polymeric nanomaterials. *Mater. Chem. Front.*, **2017**, *1*, 1200-1206.

## 5. NMR-Spectra of 2

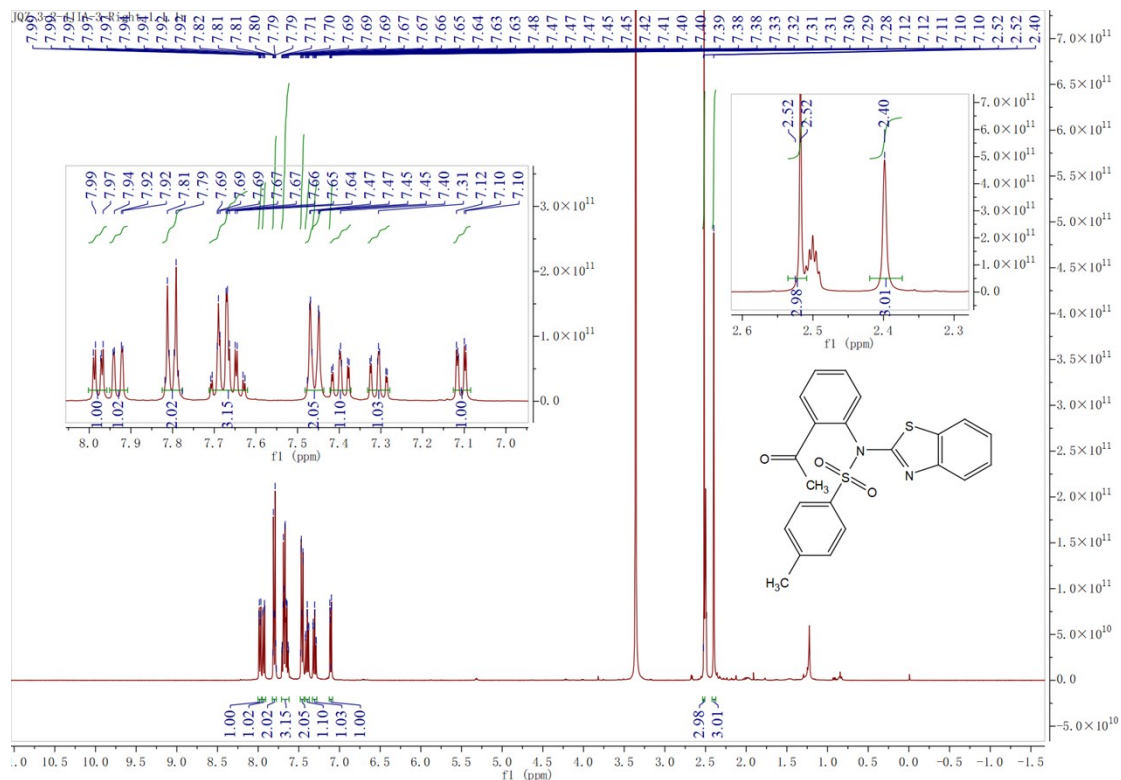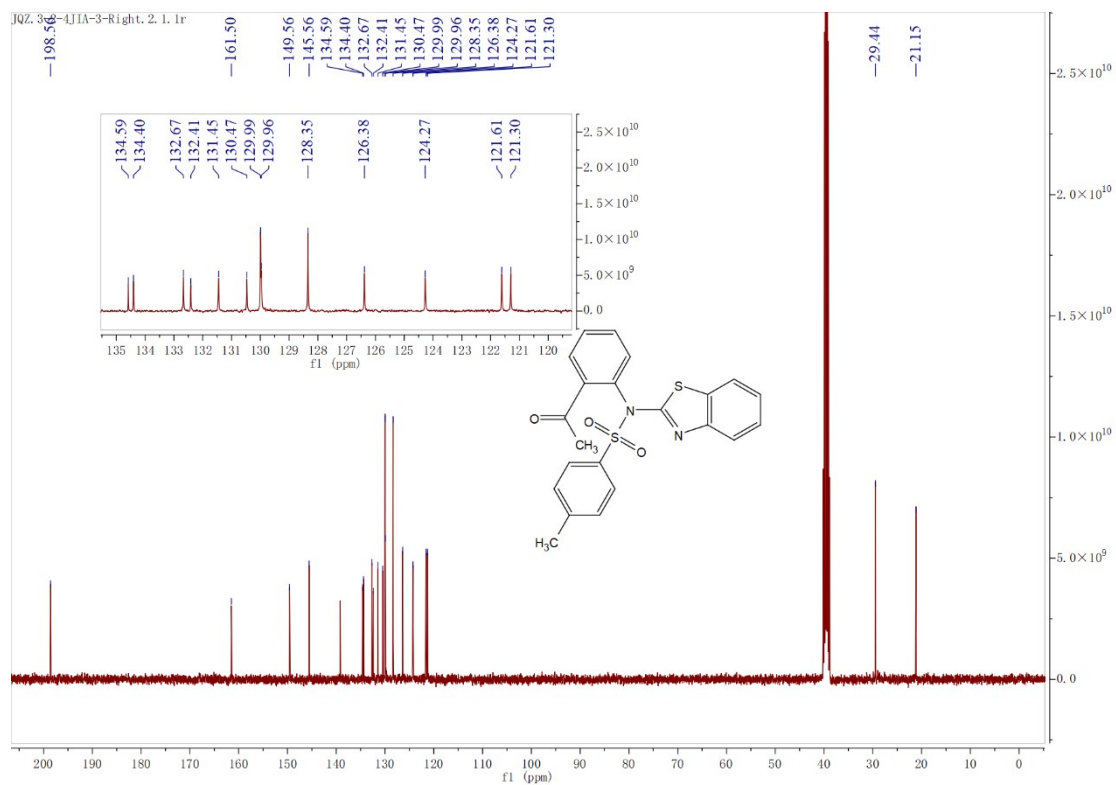



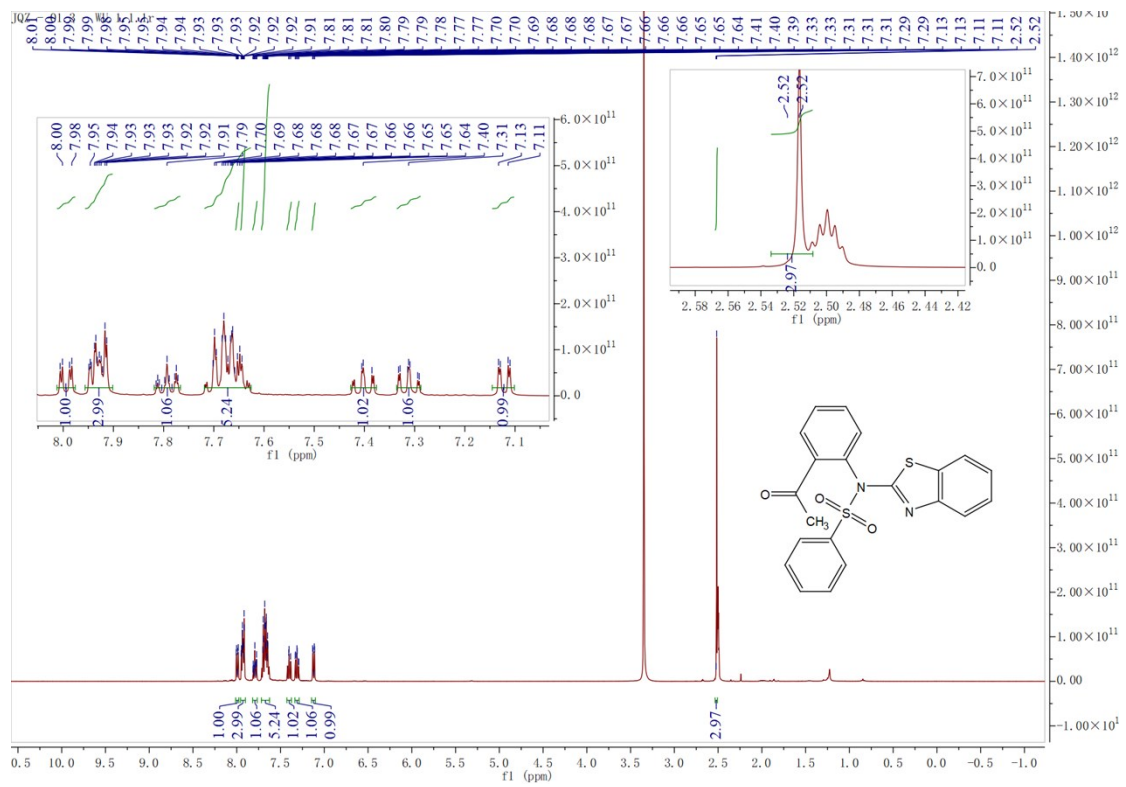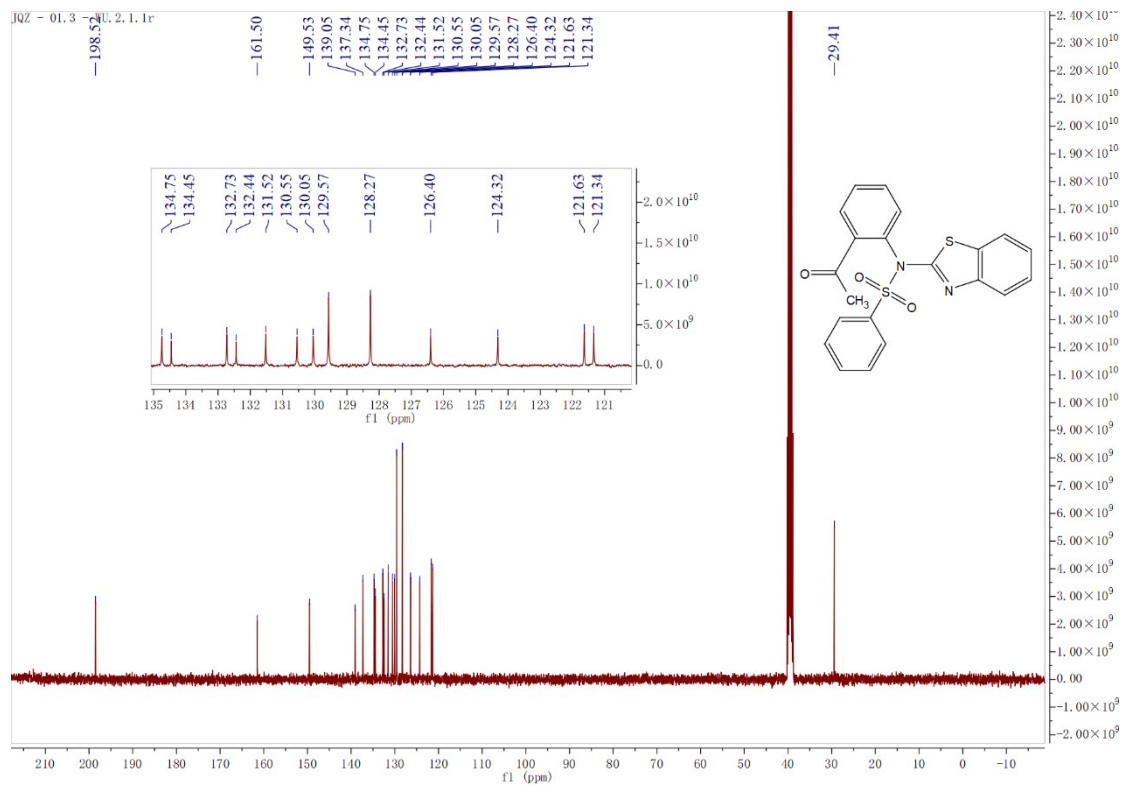

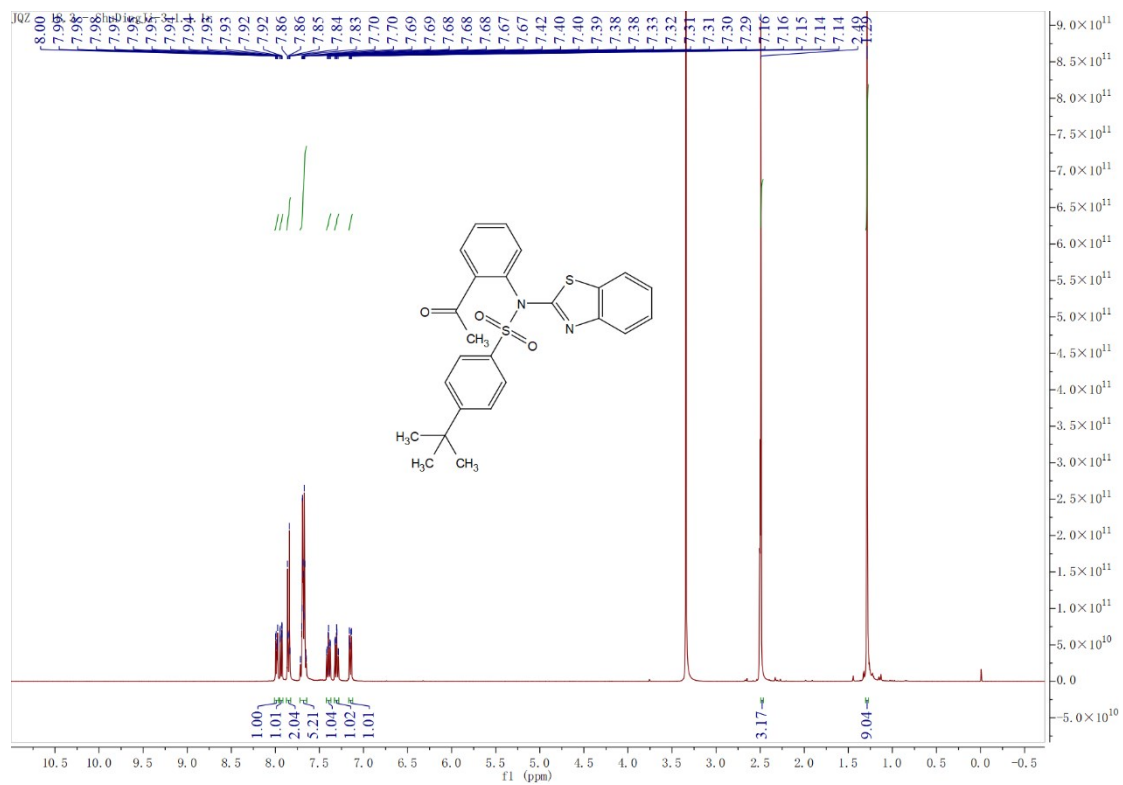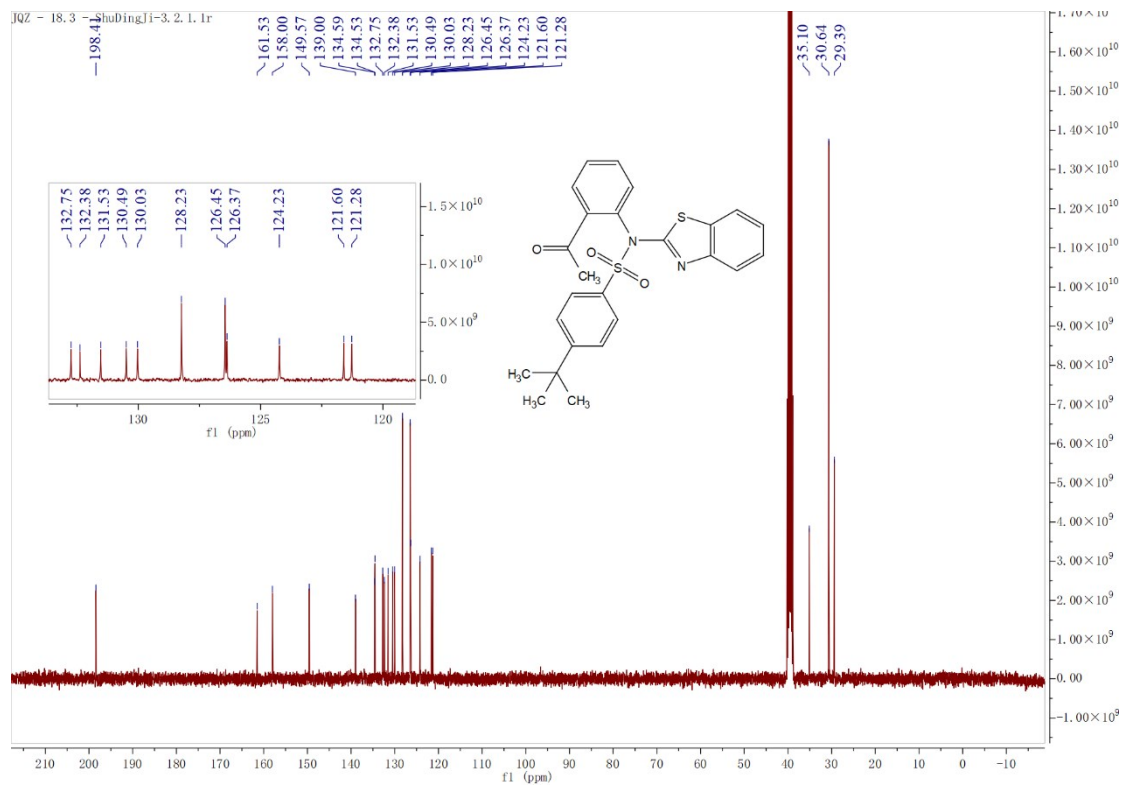

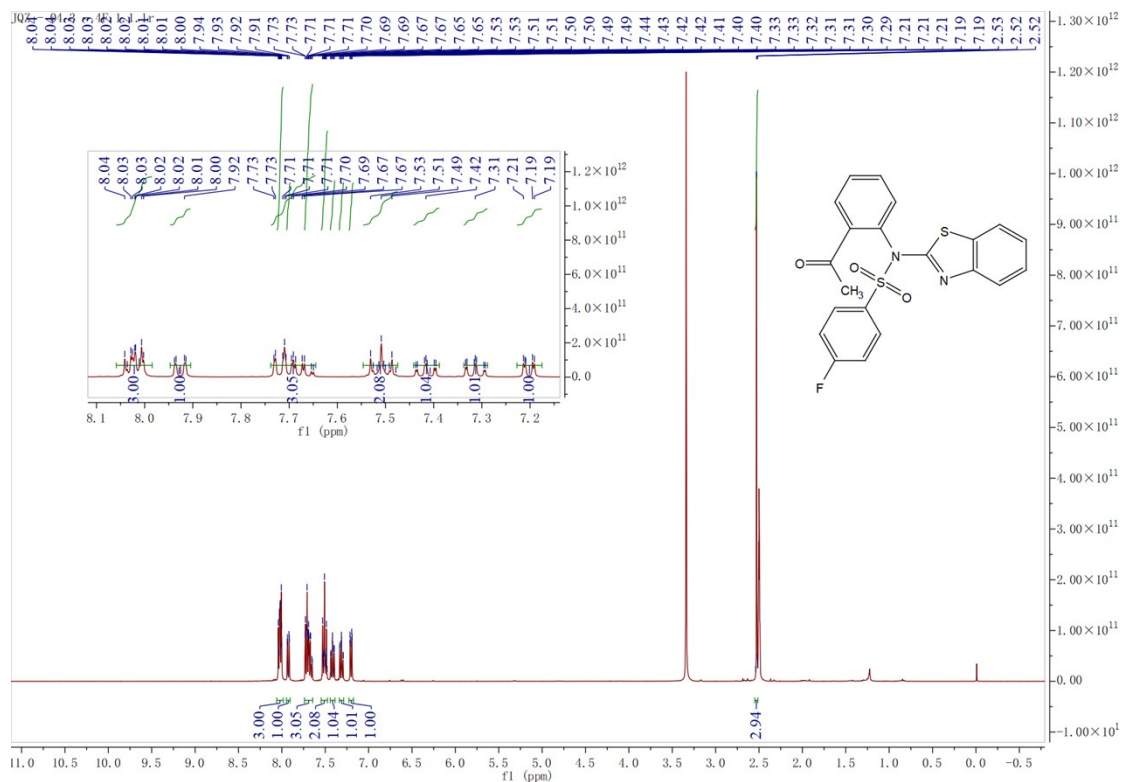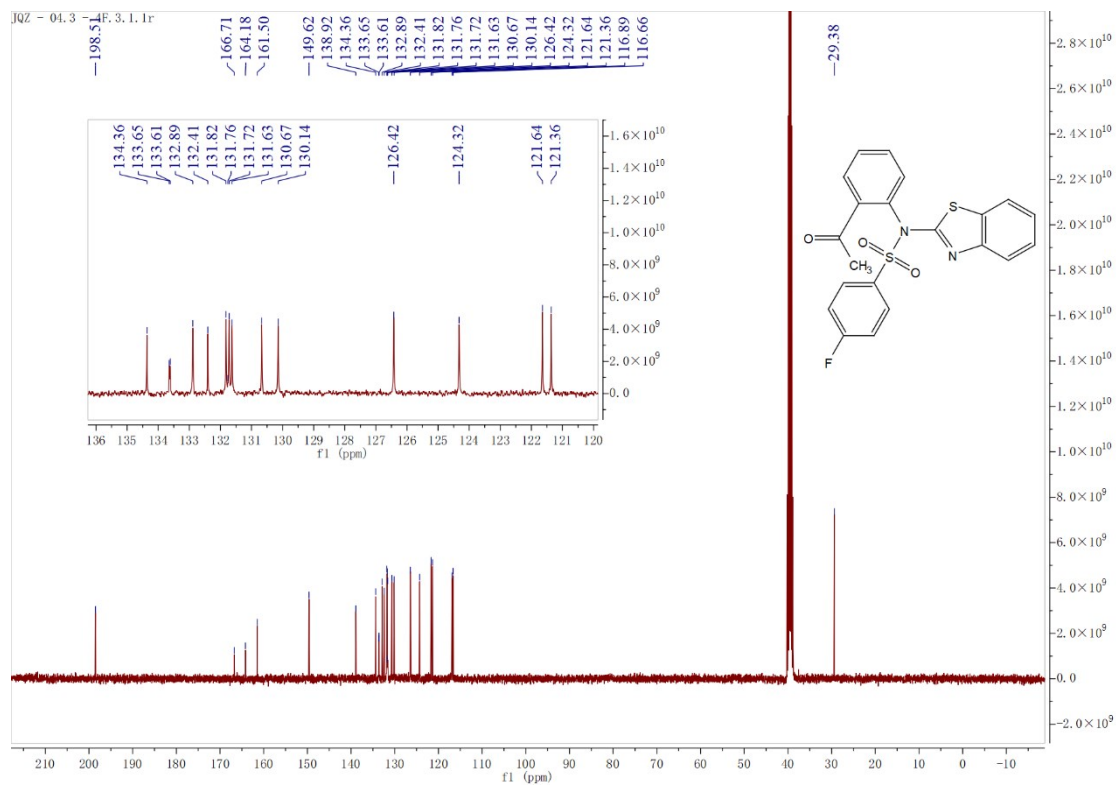

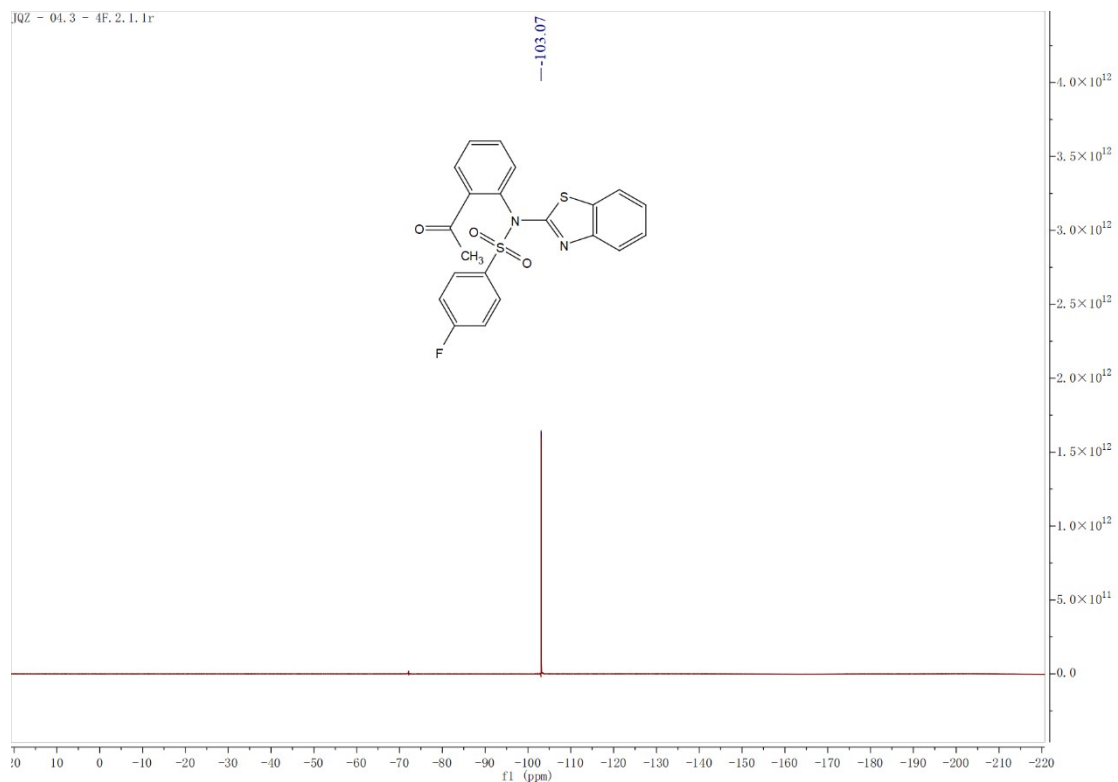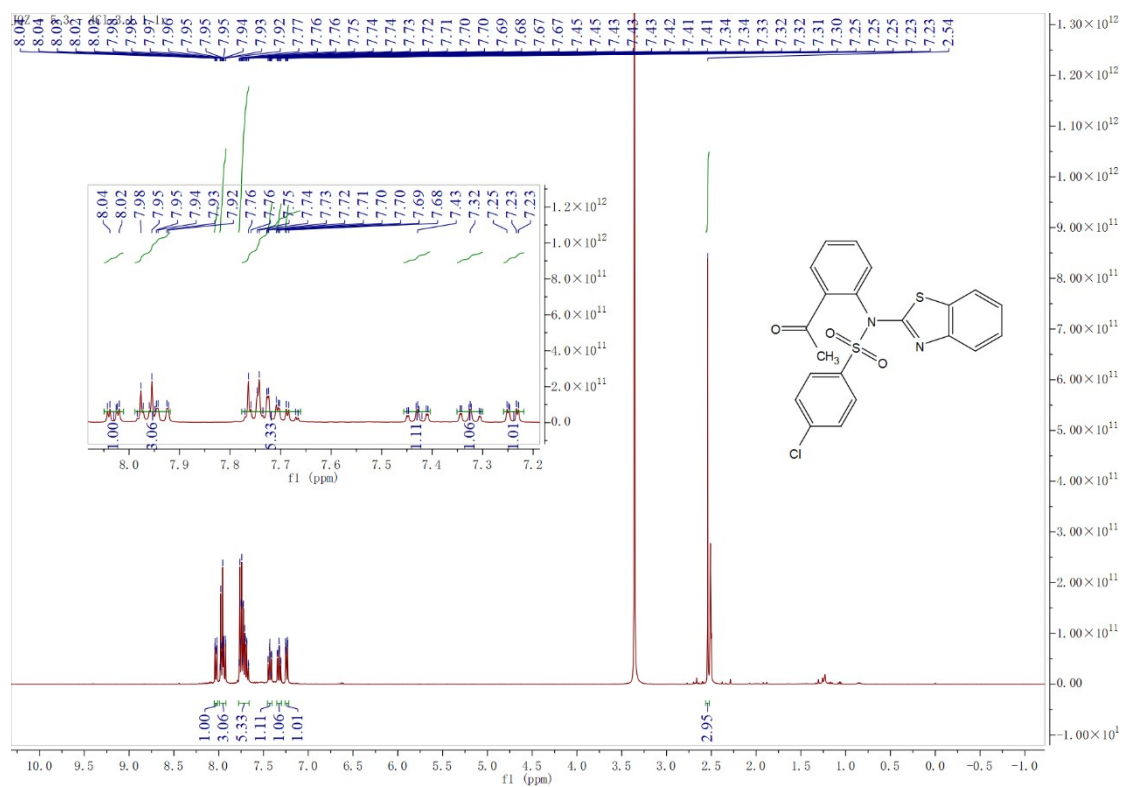

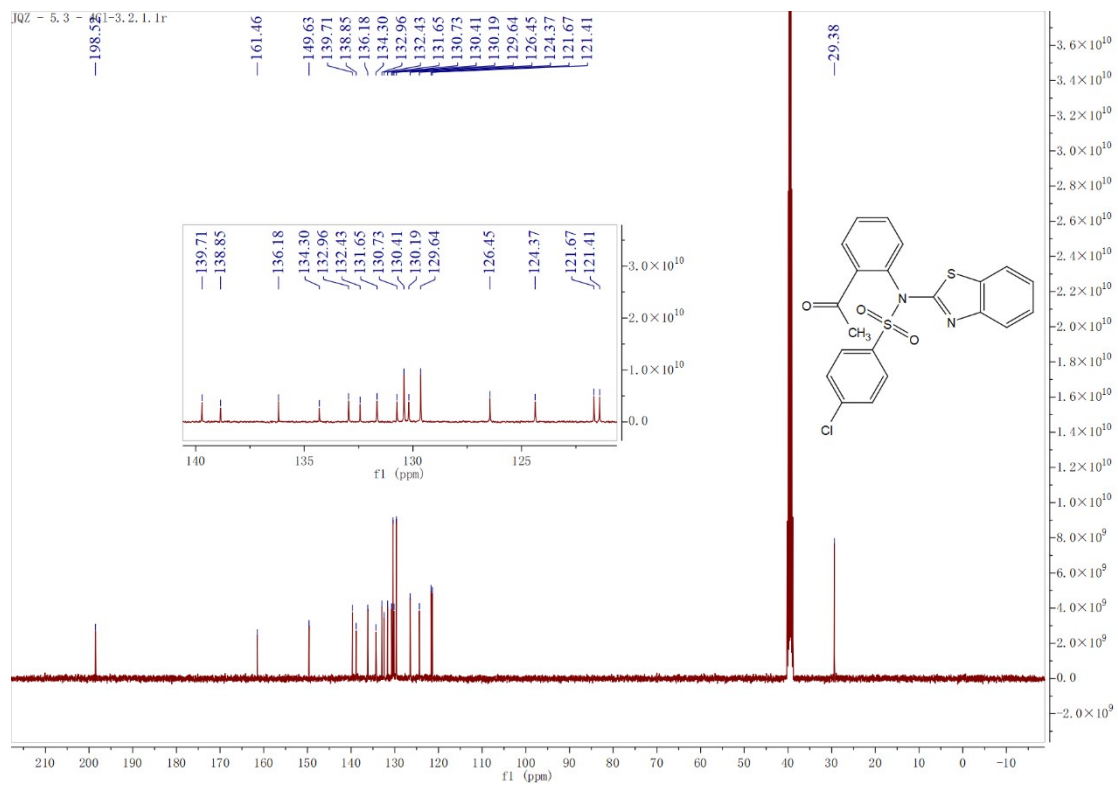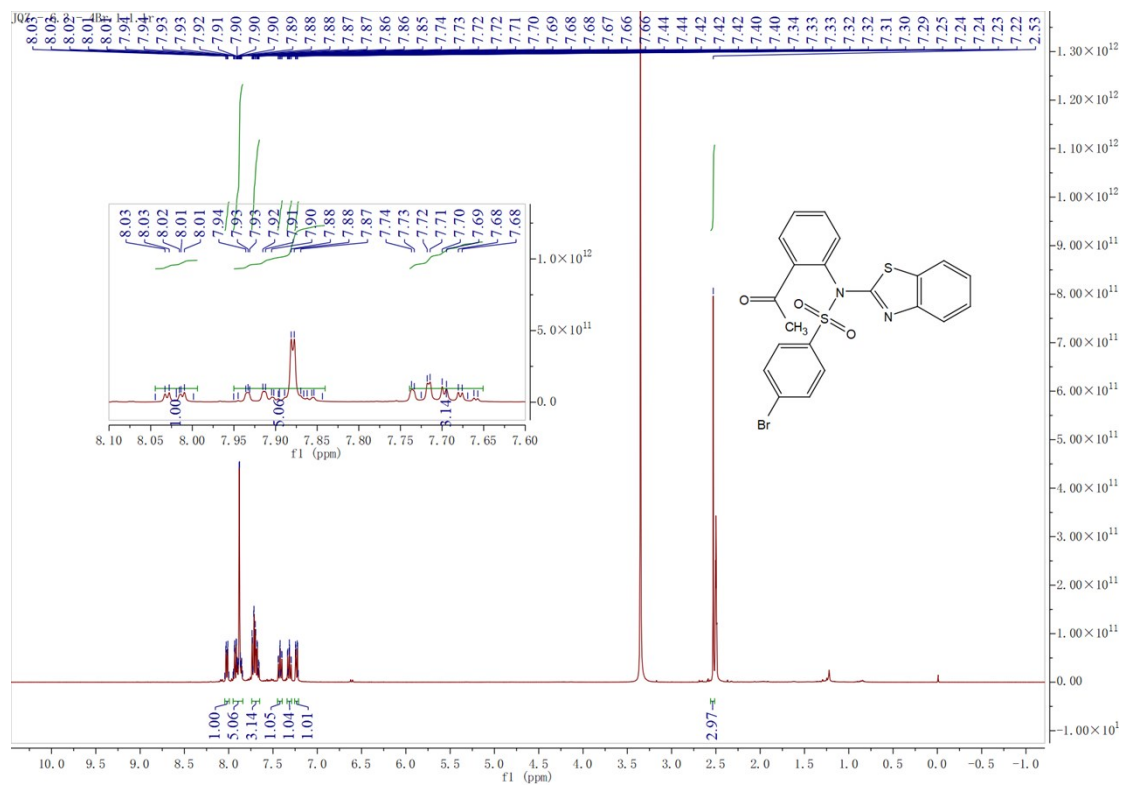

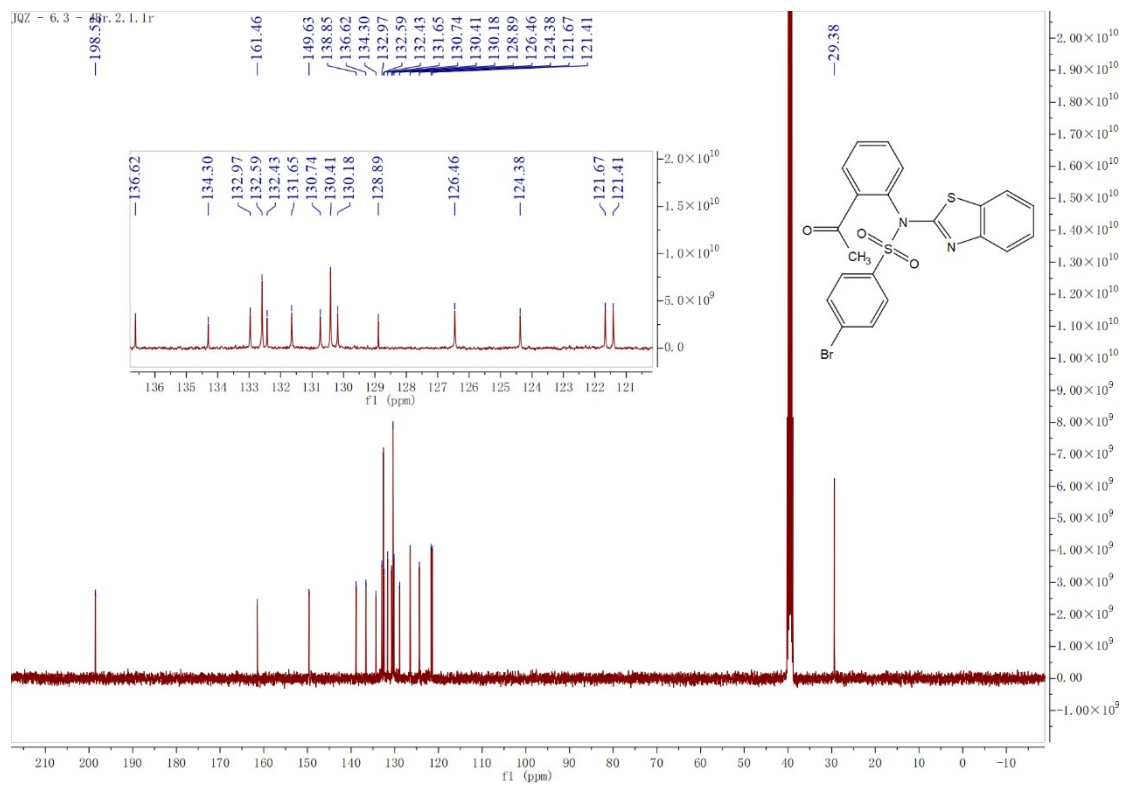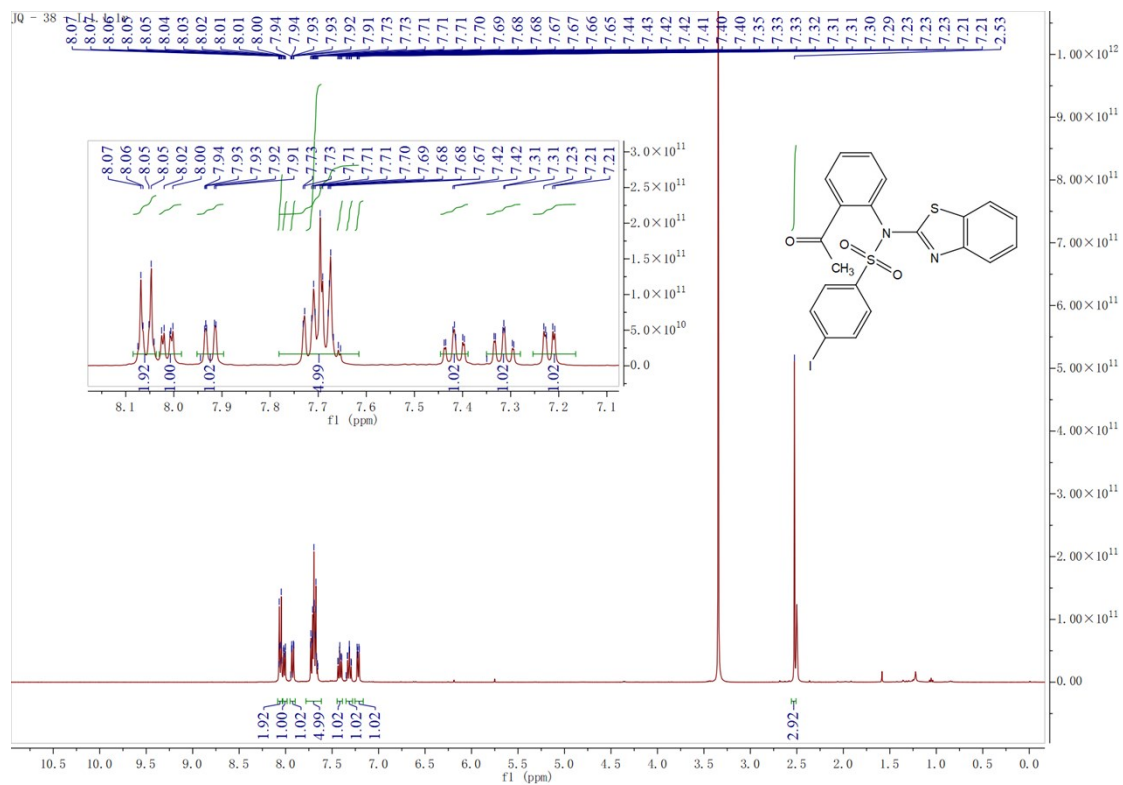

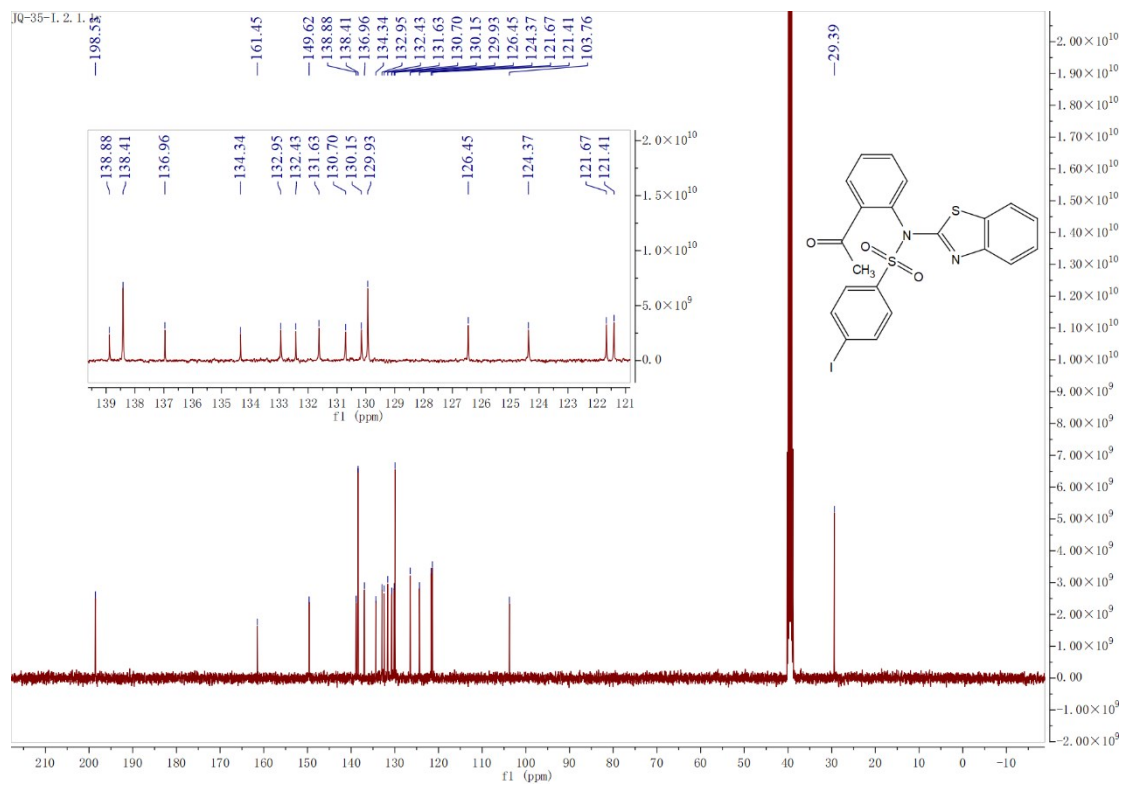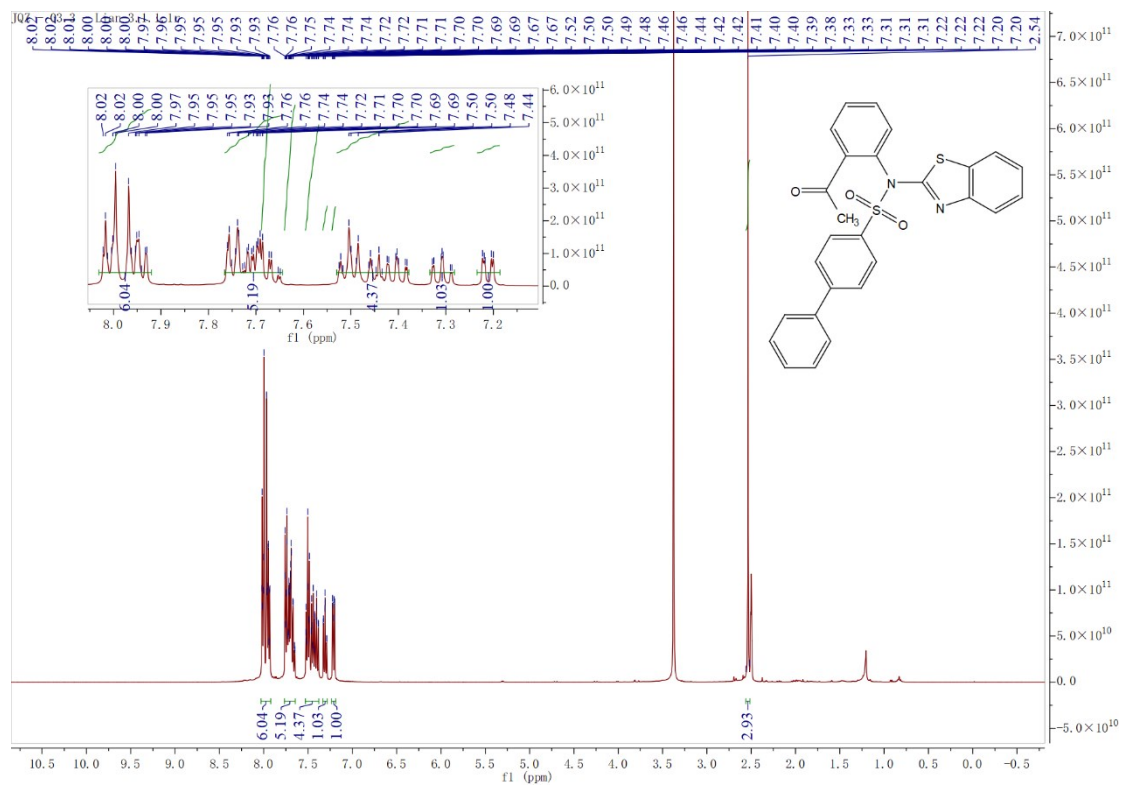

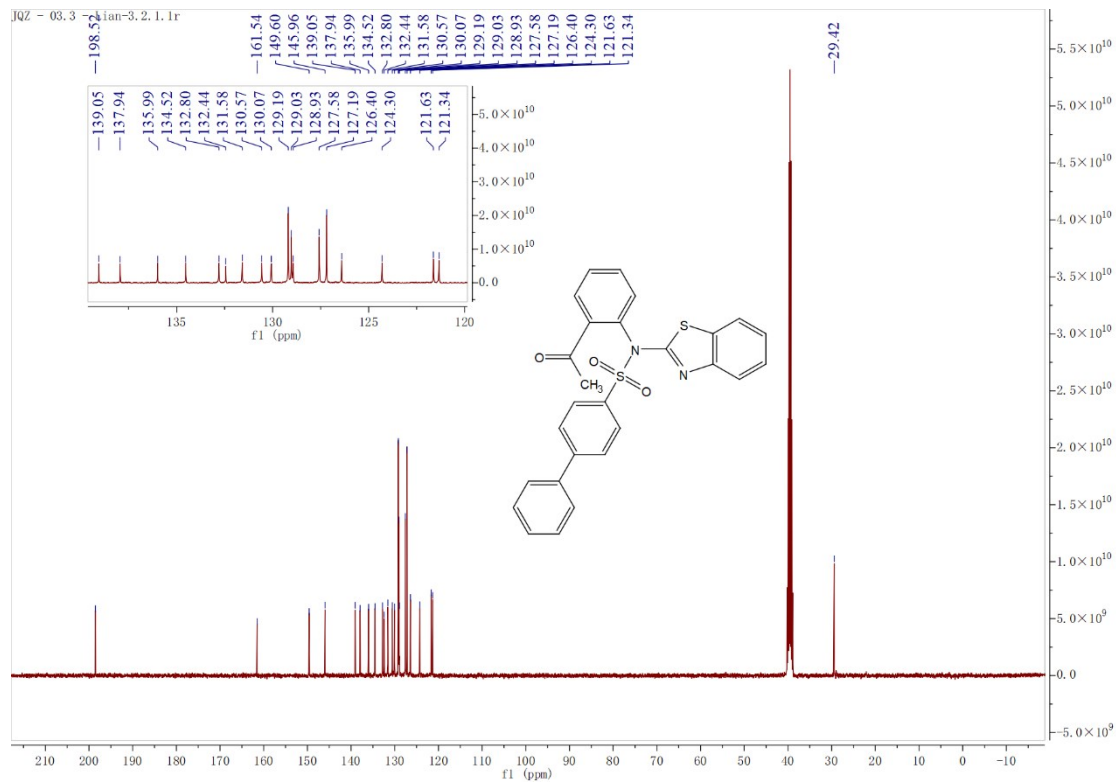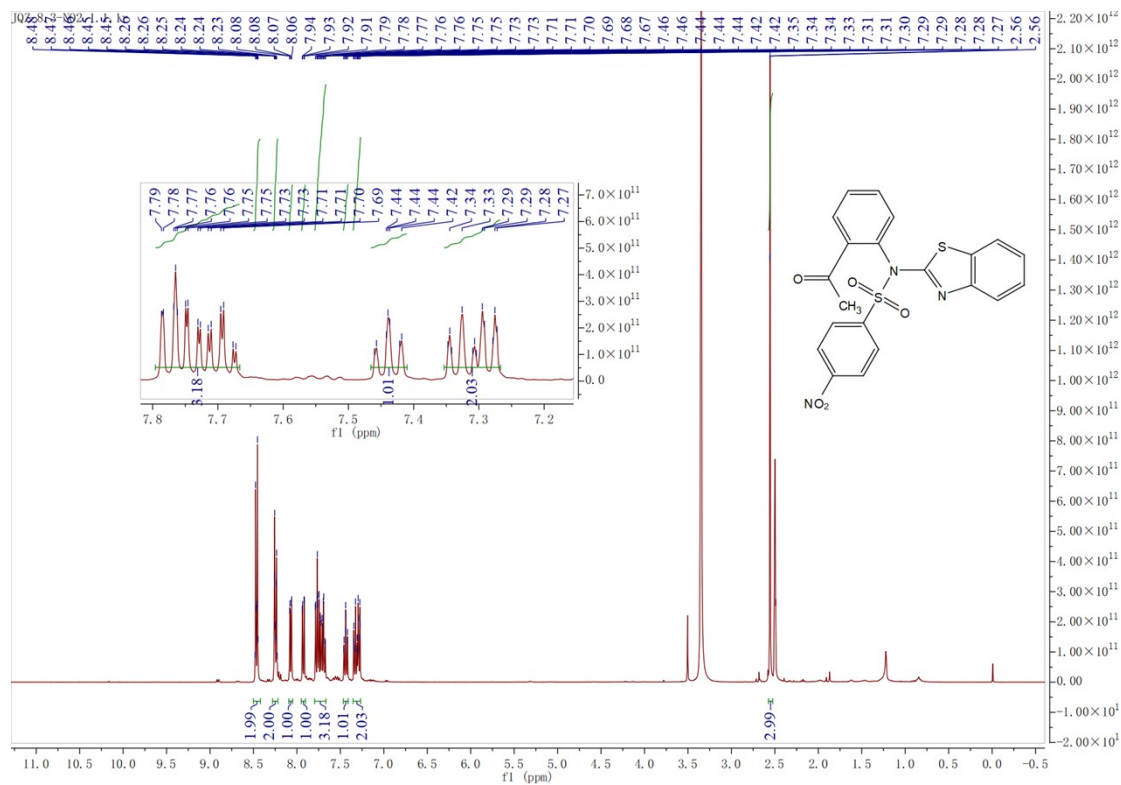



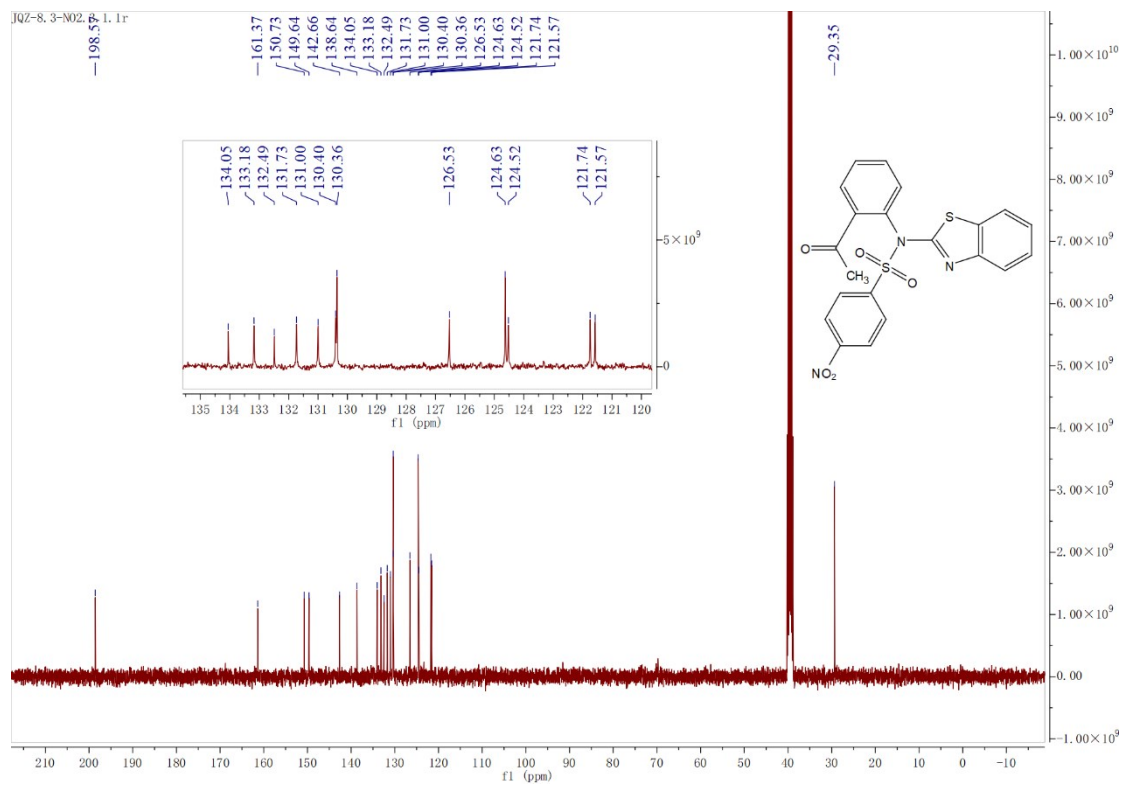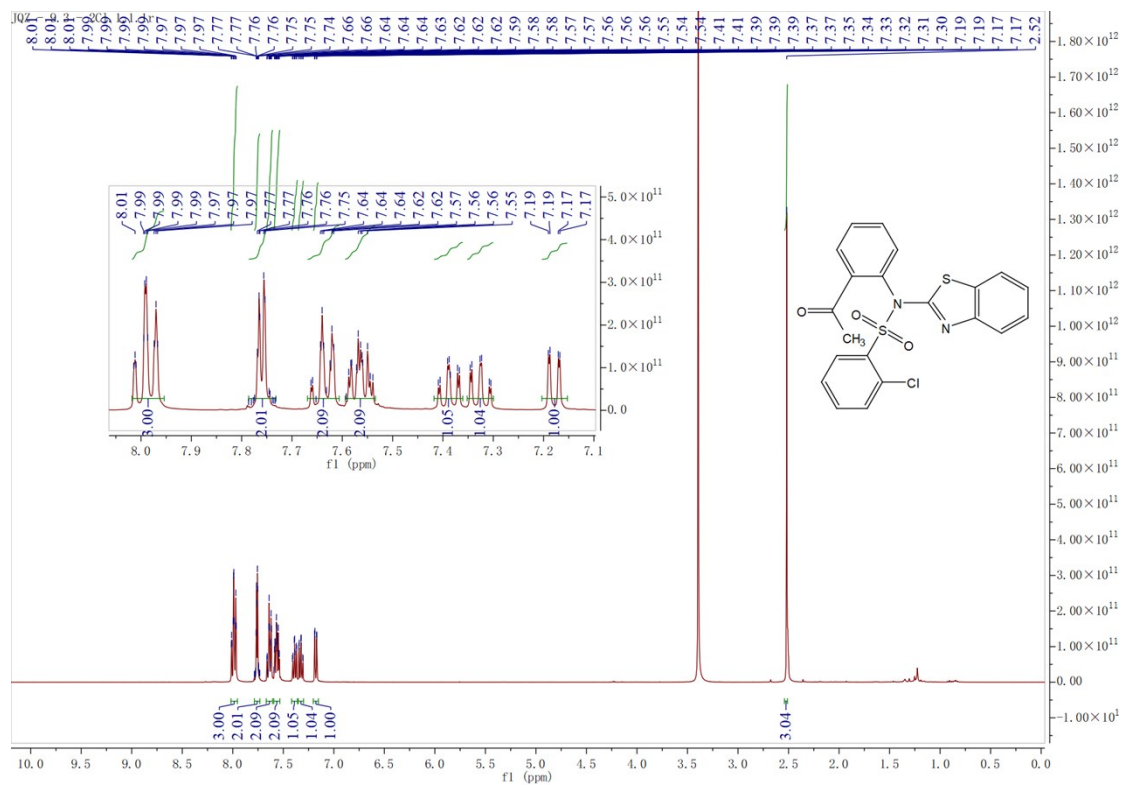

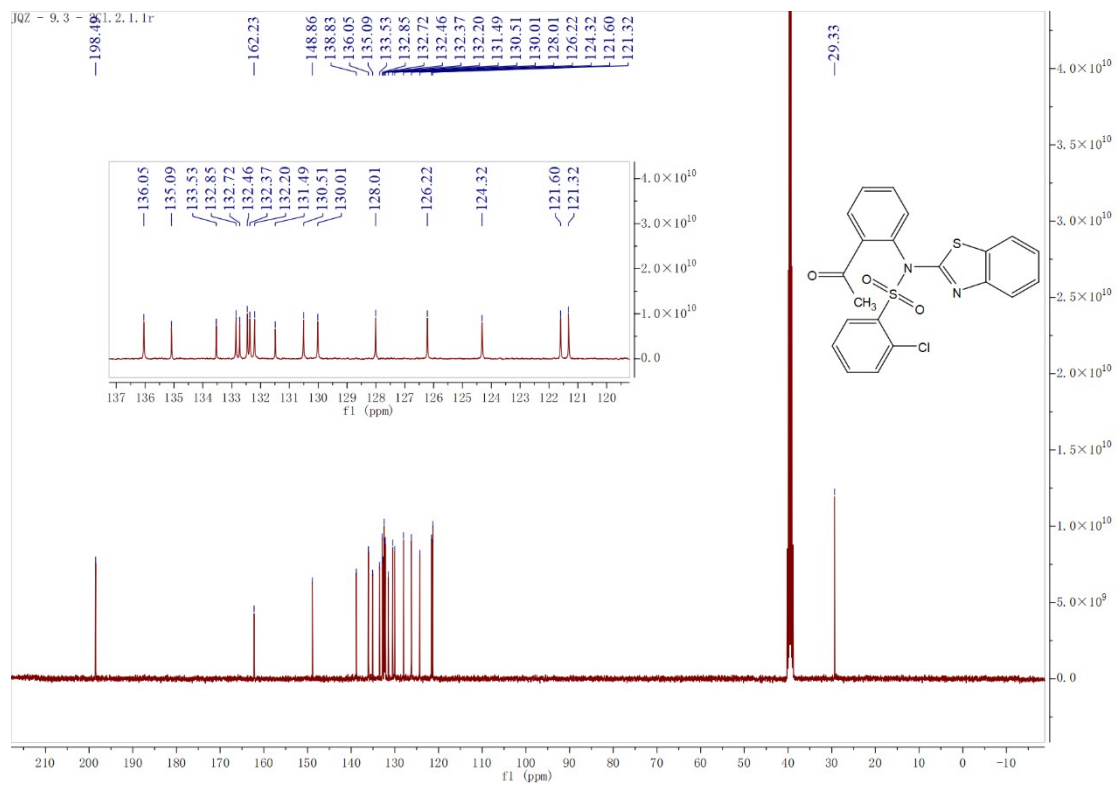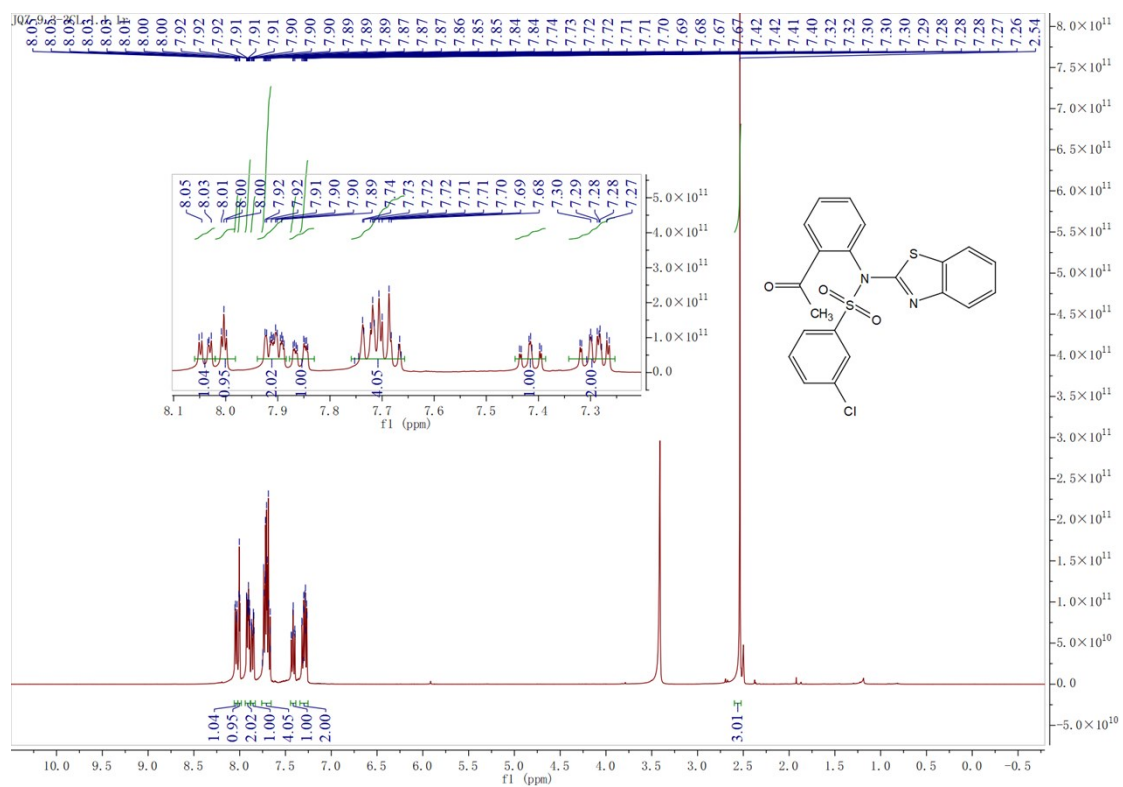

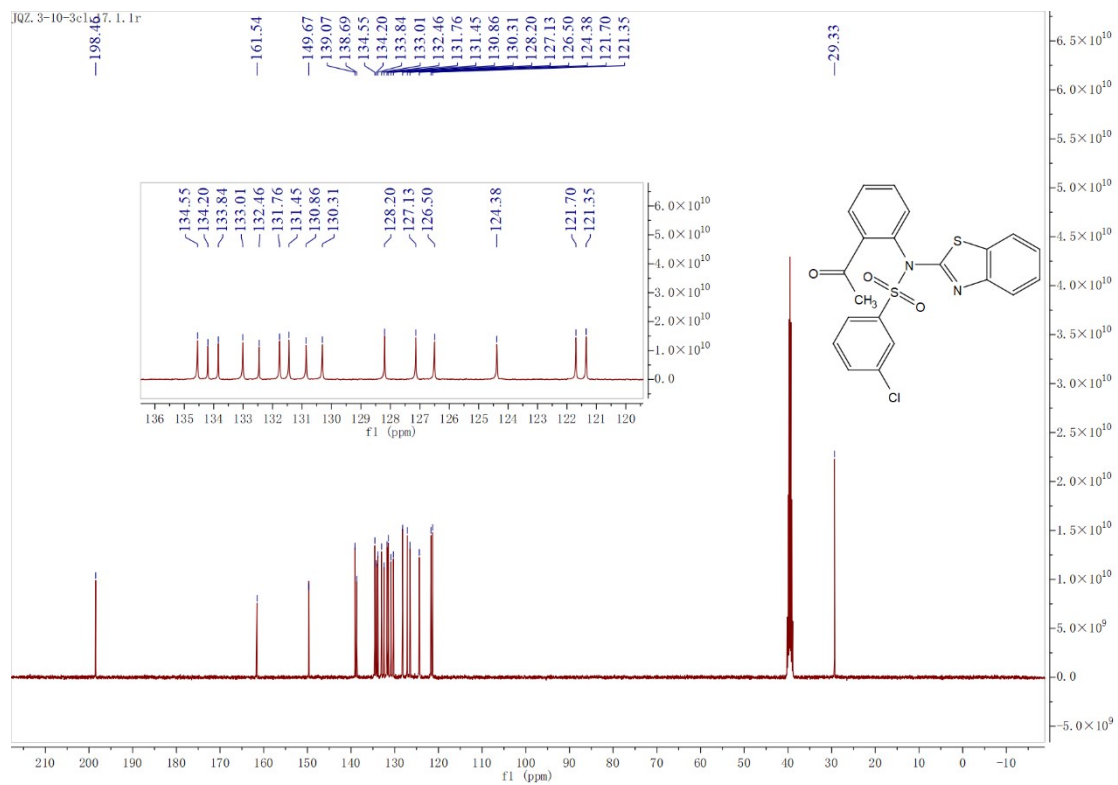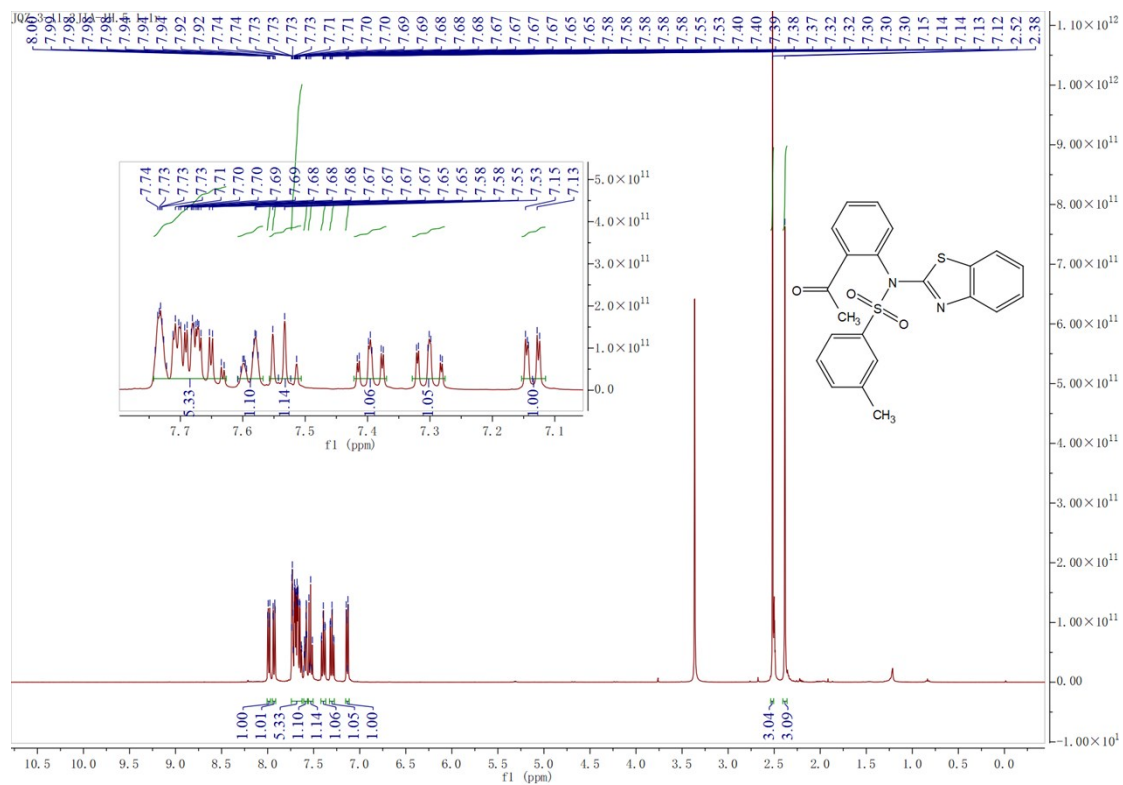



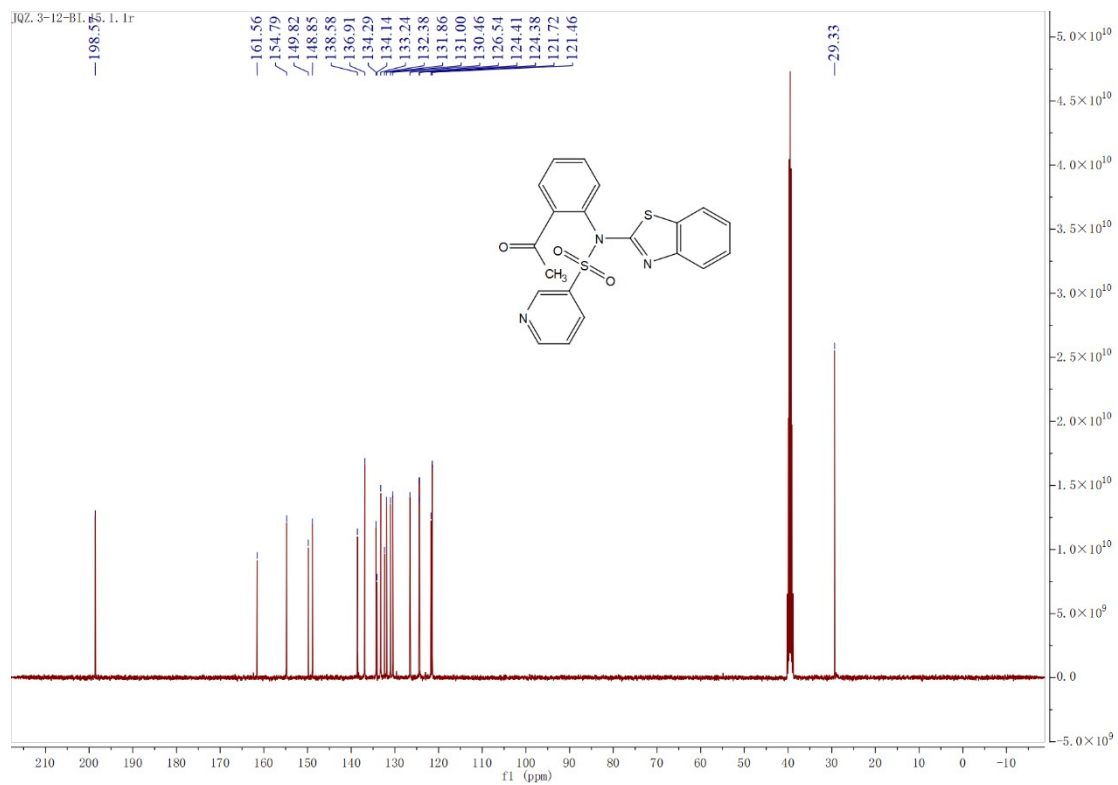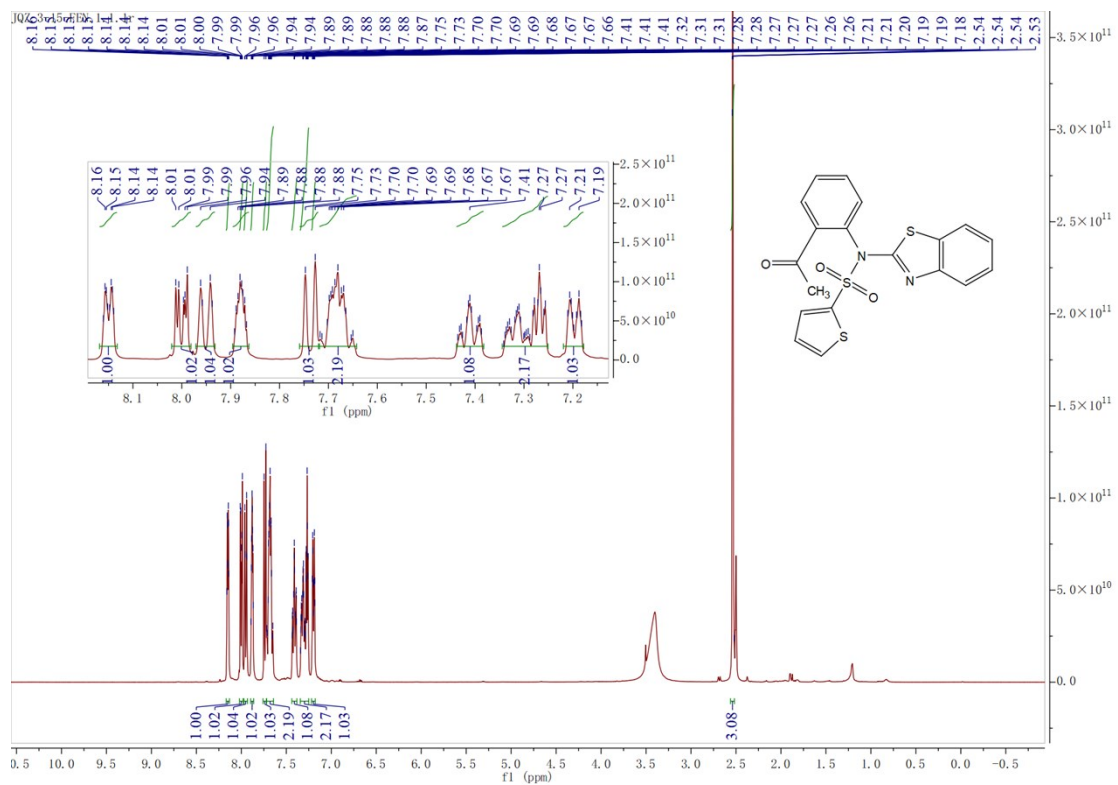

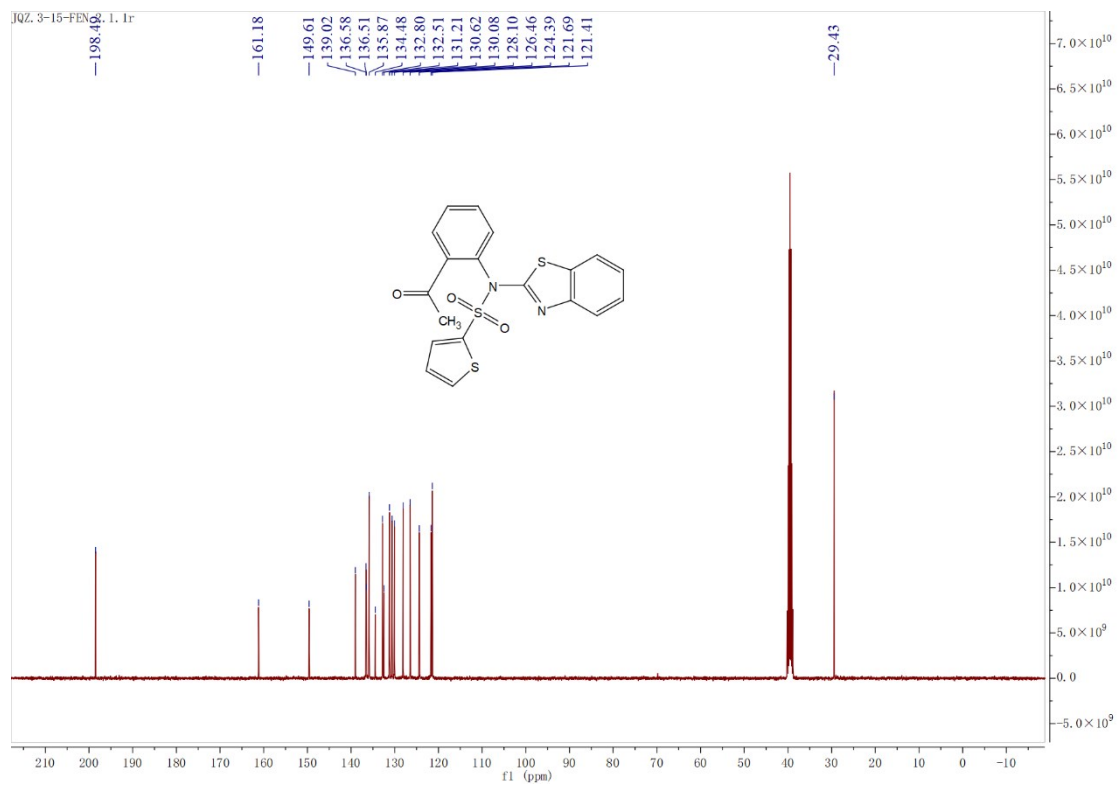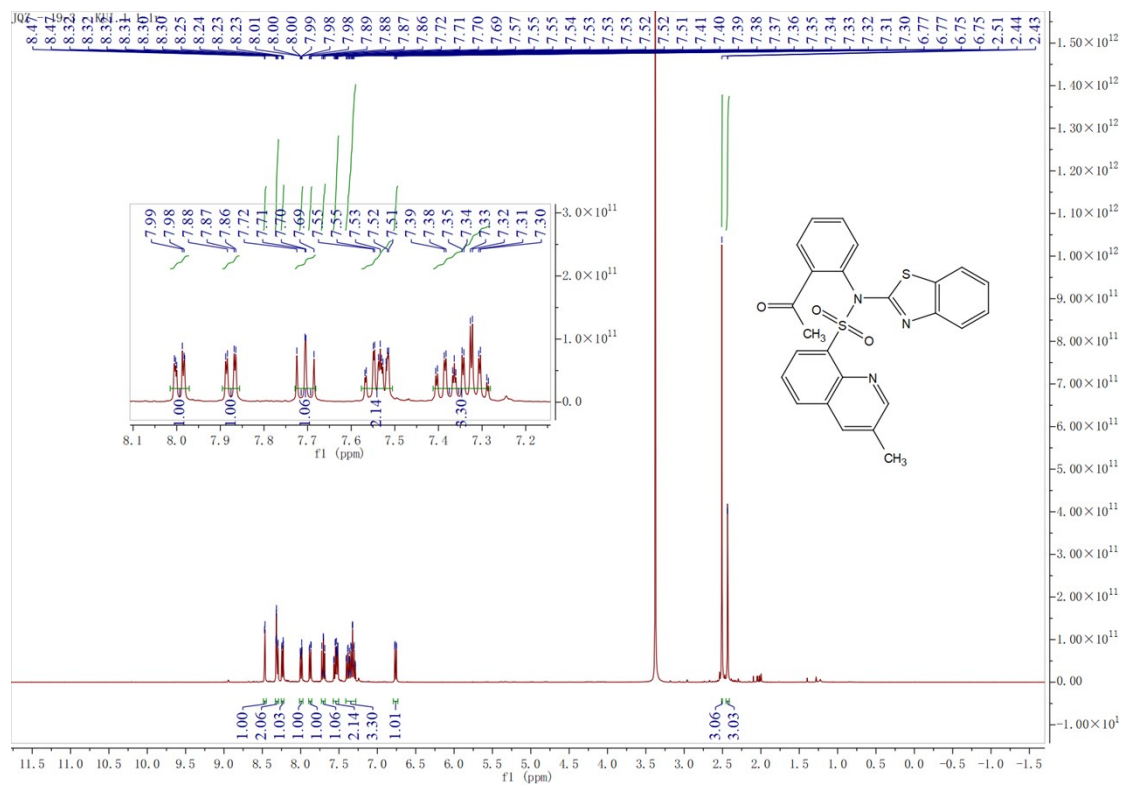

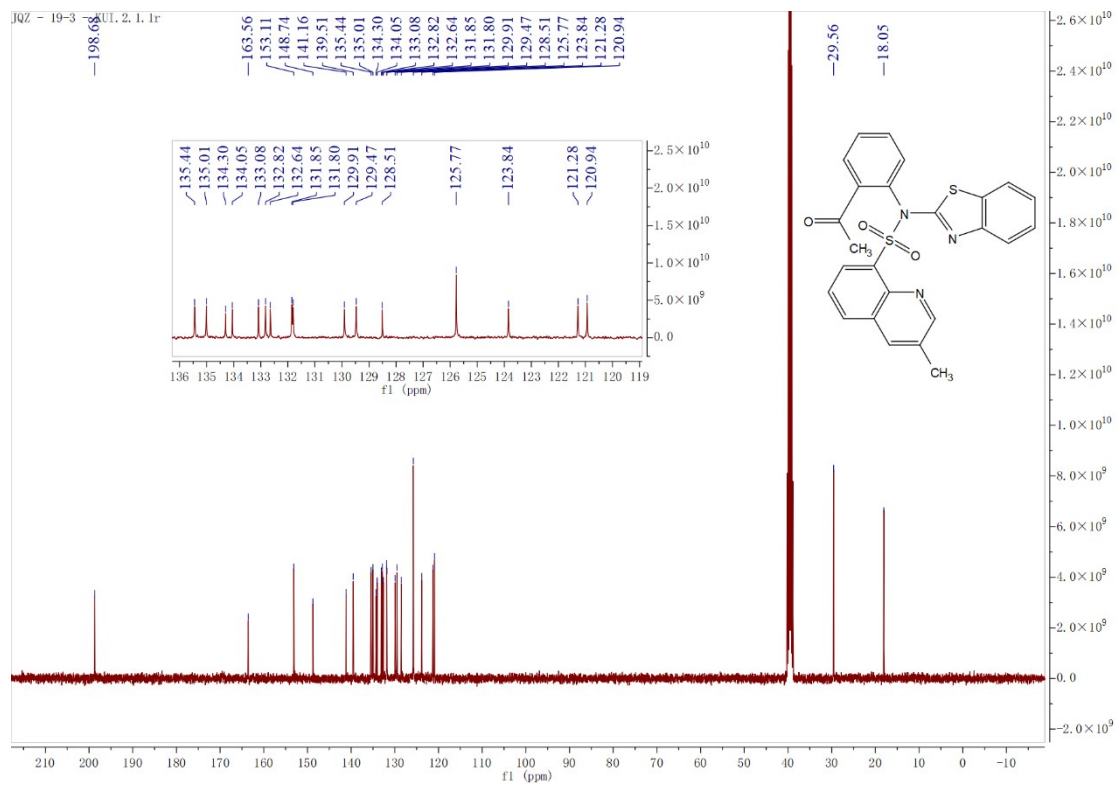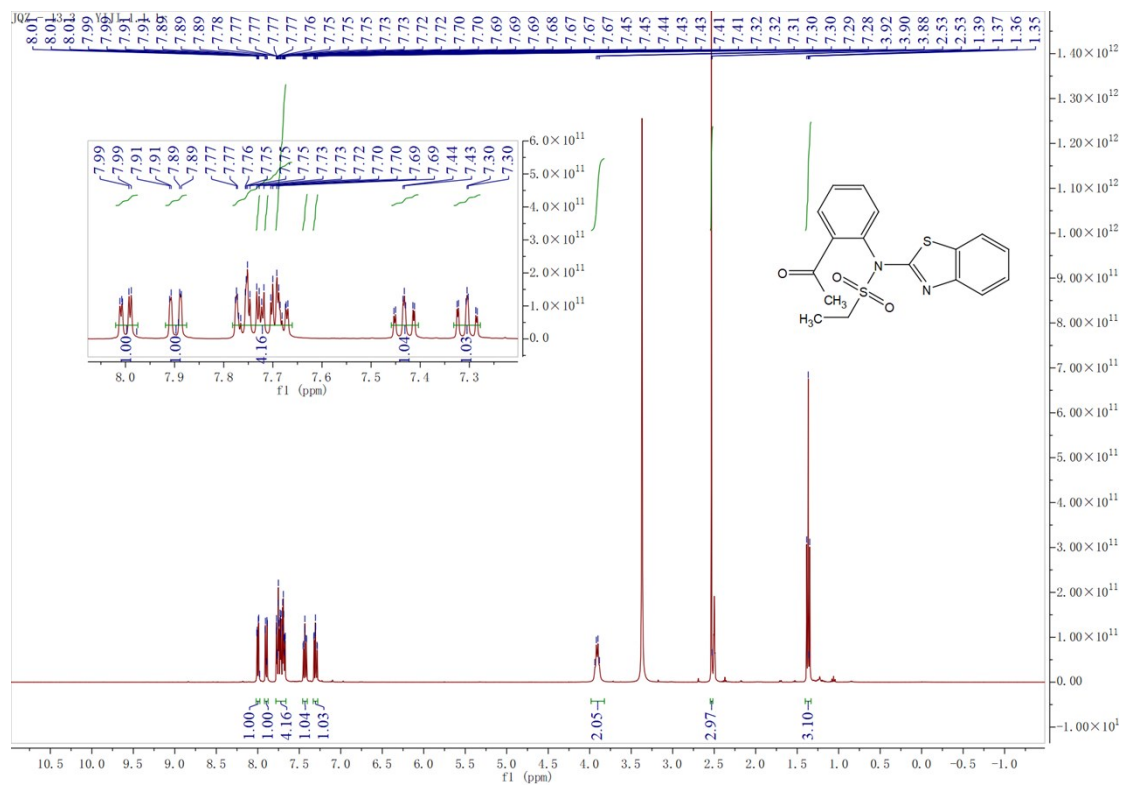

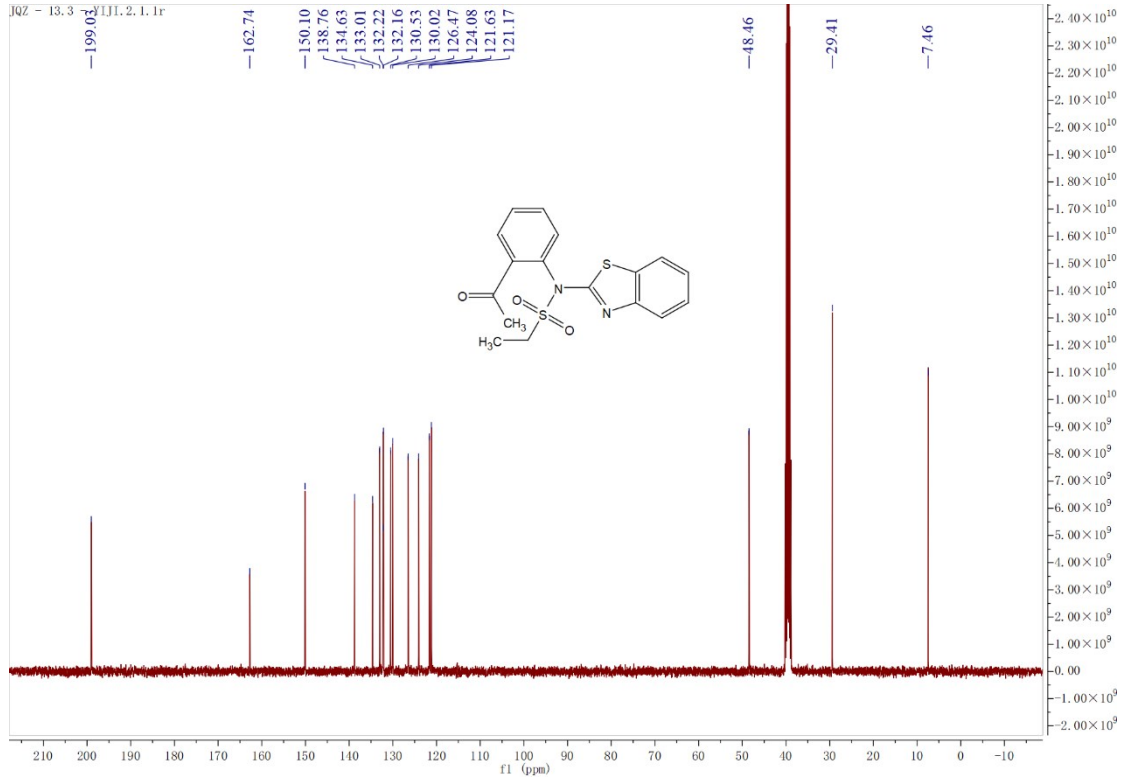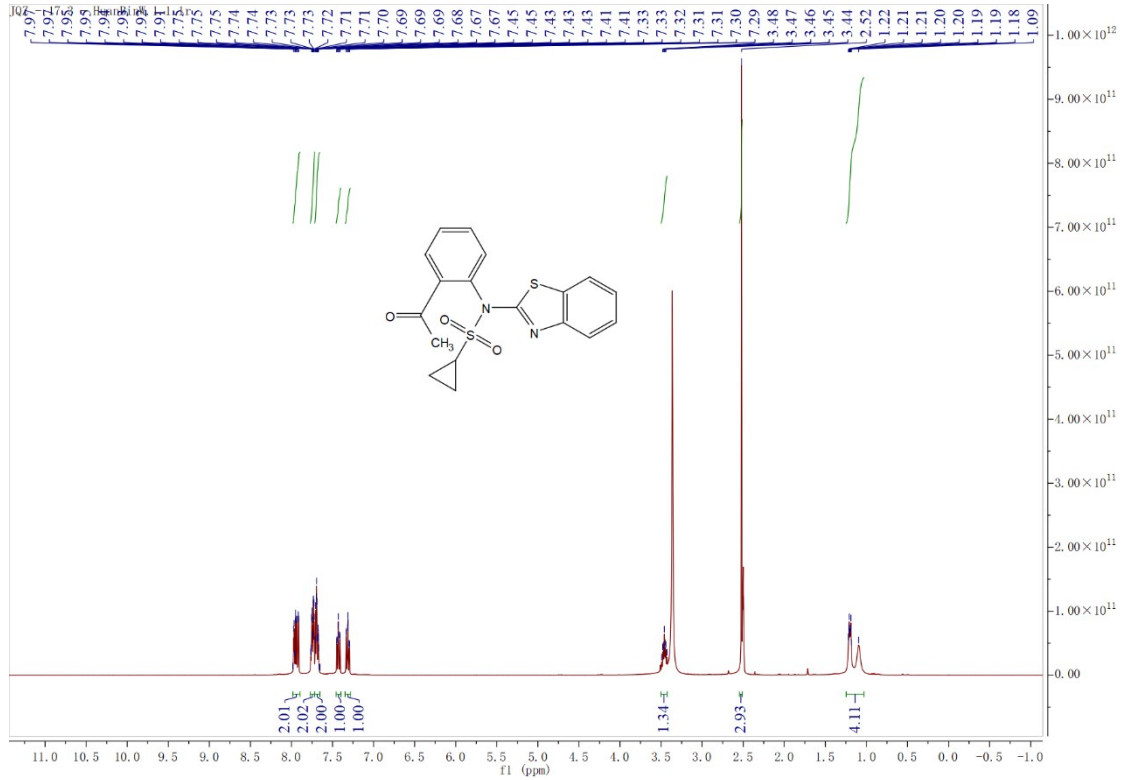



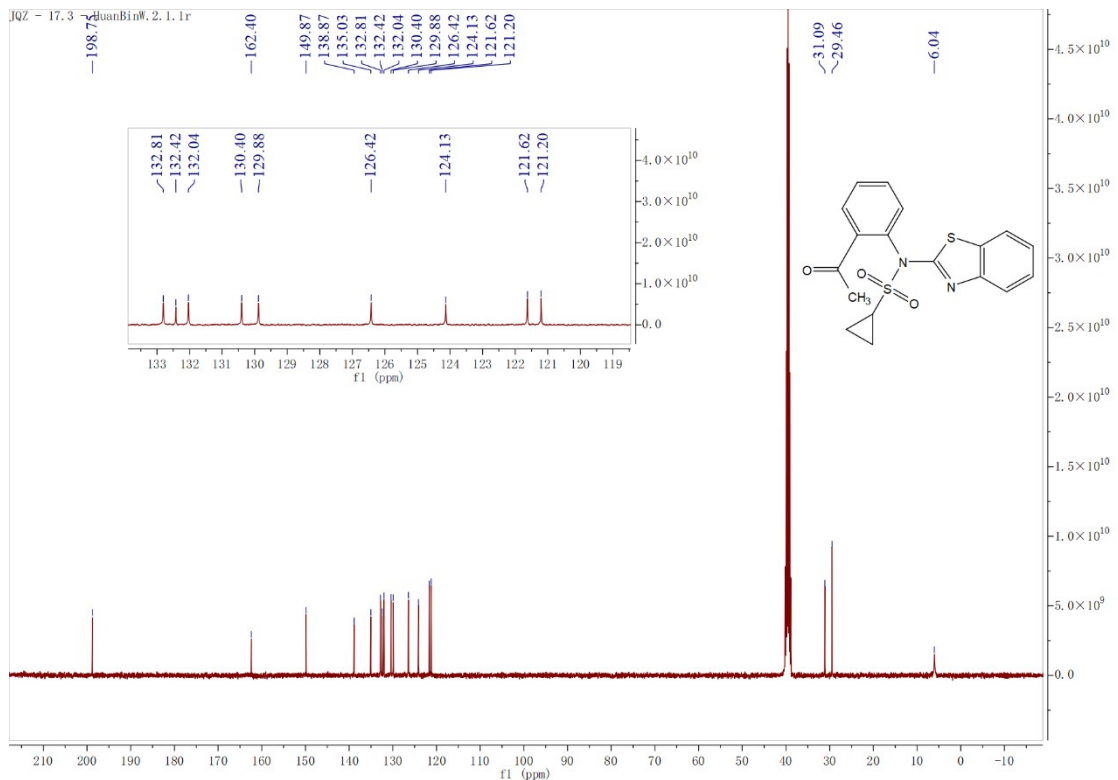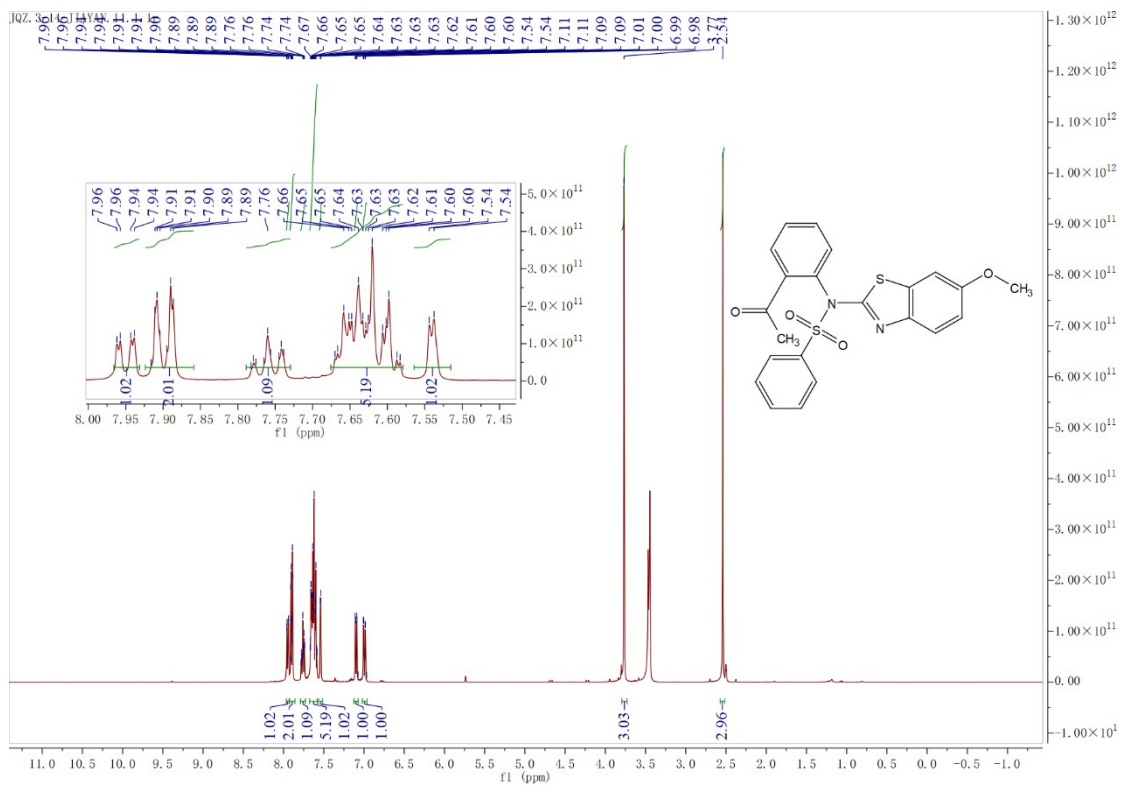

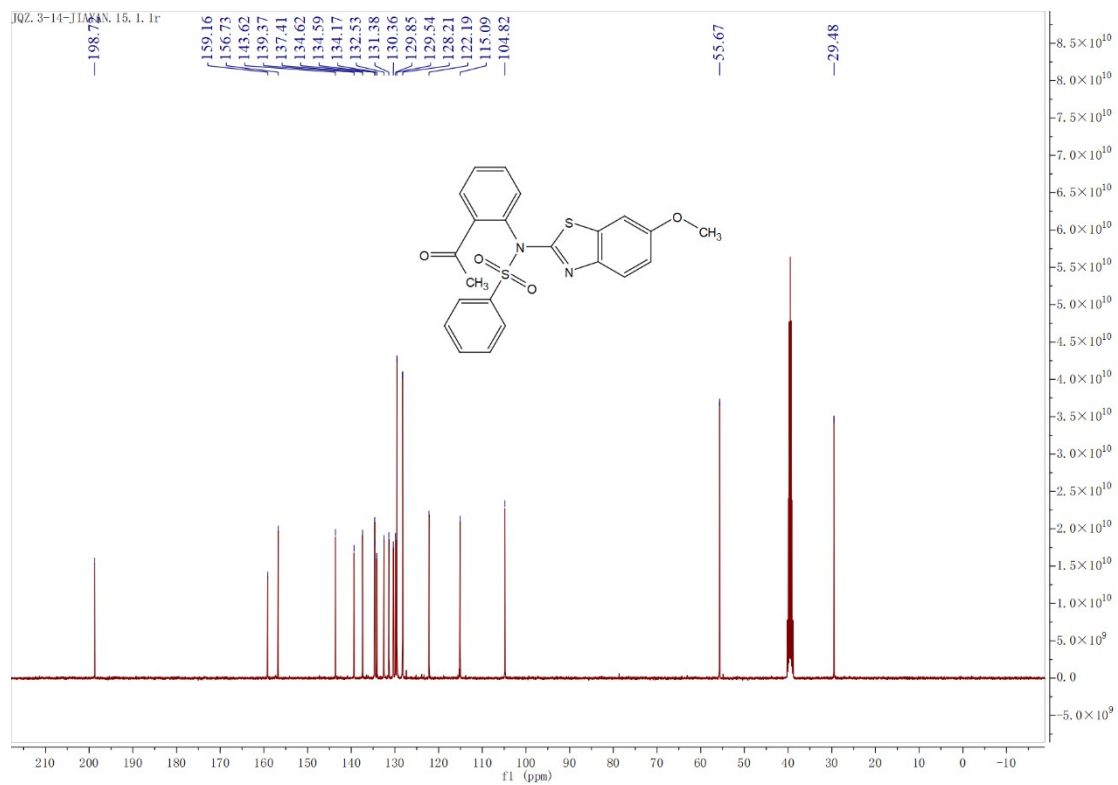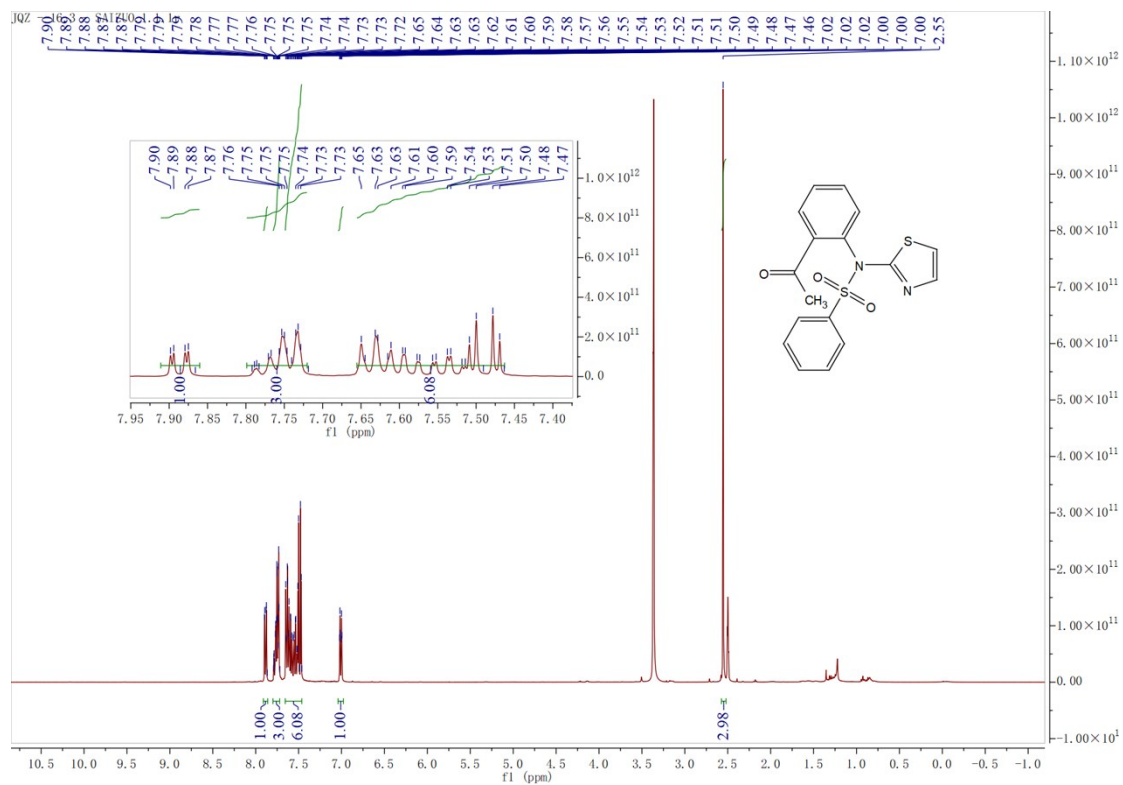

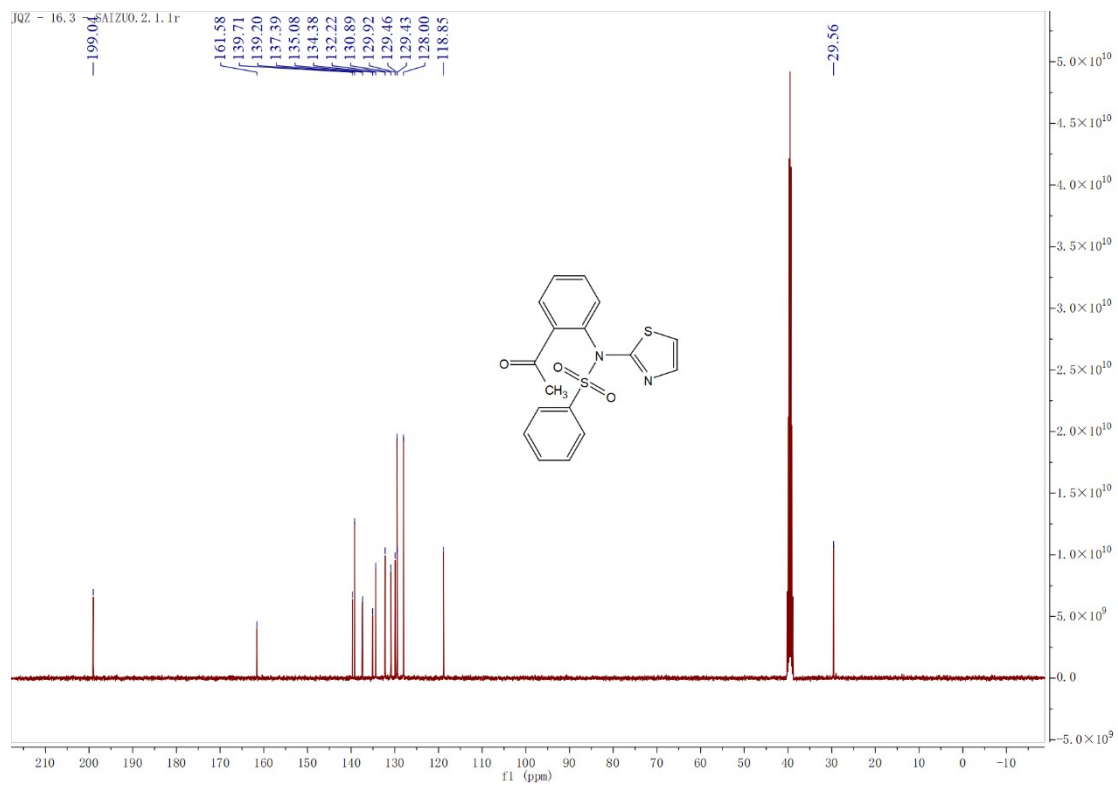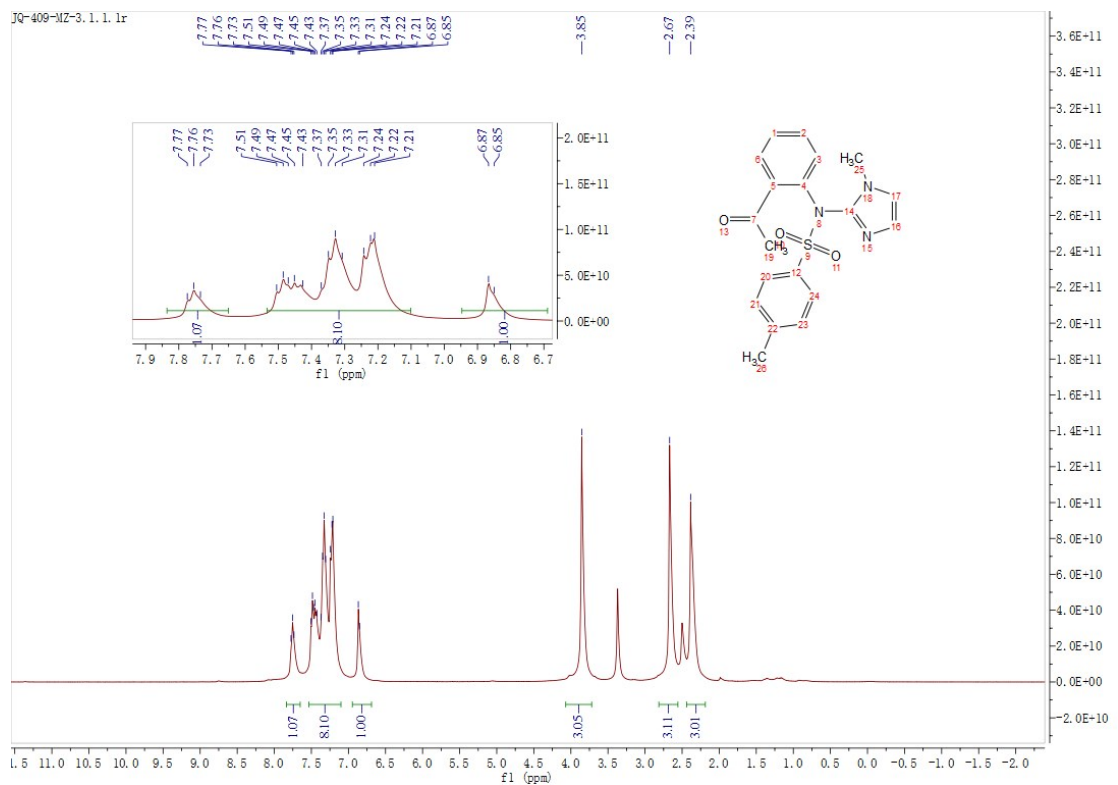

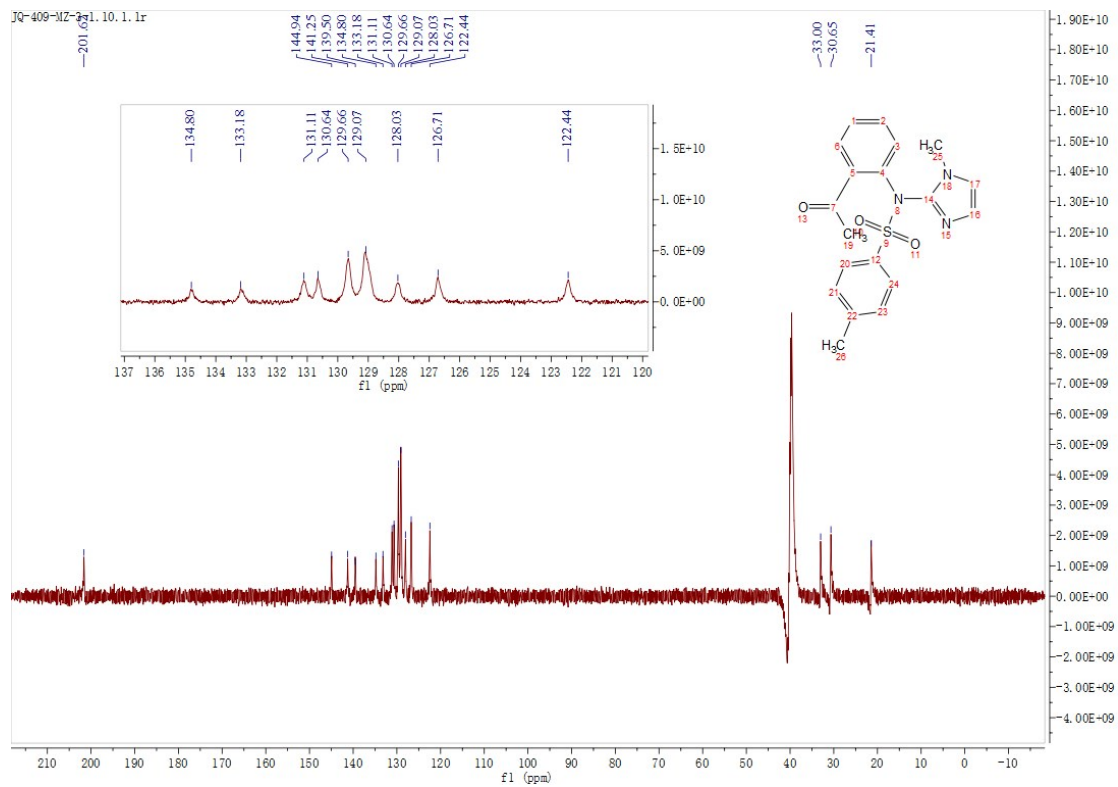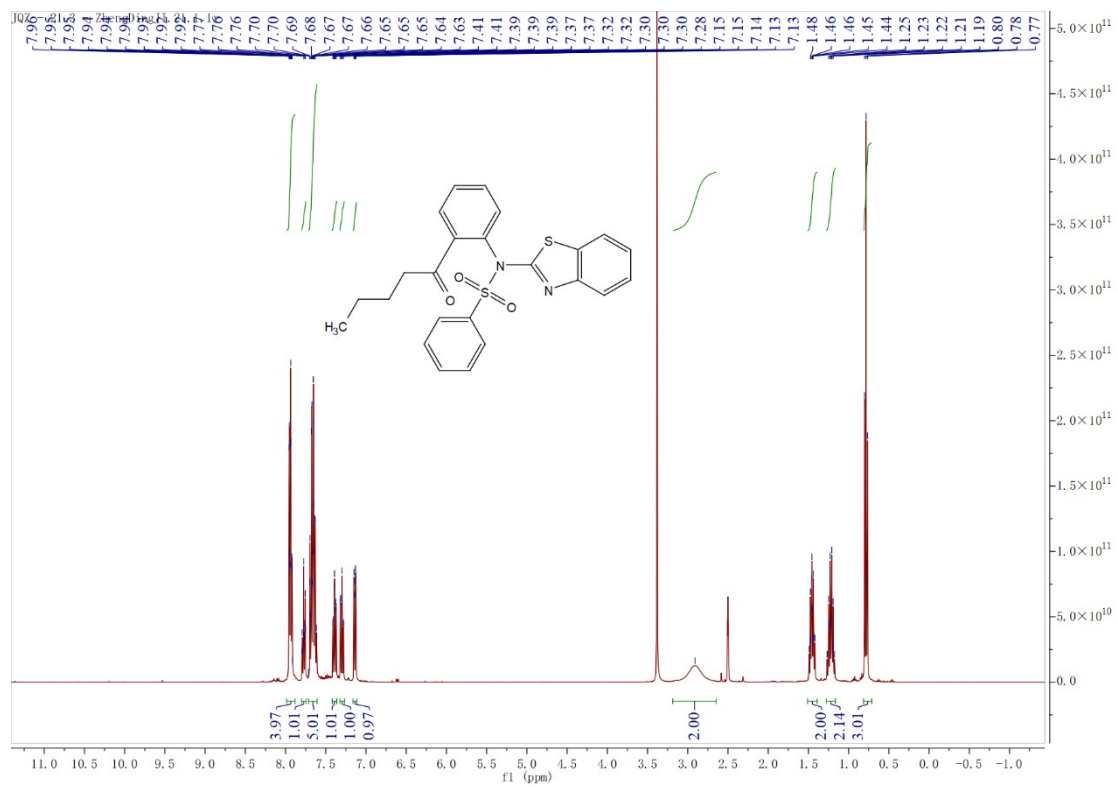

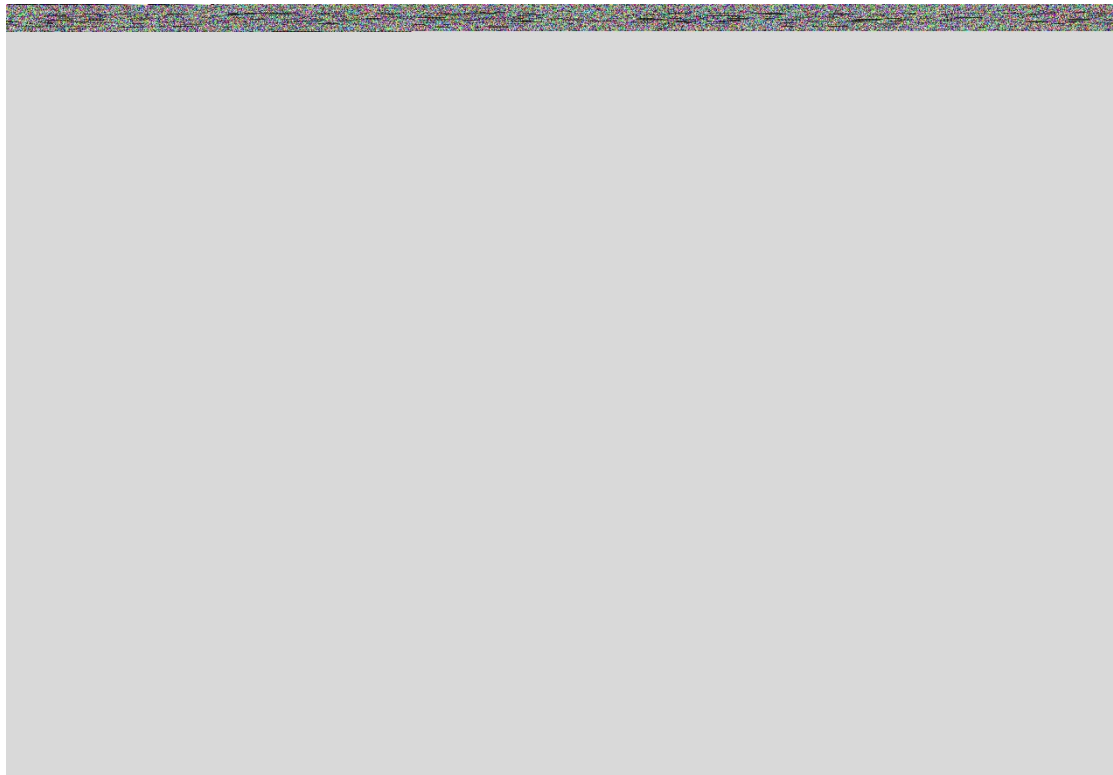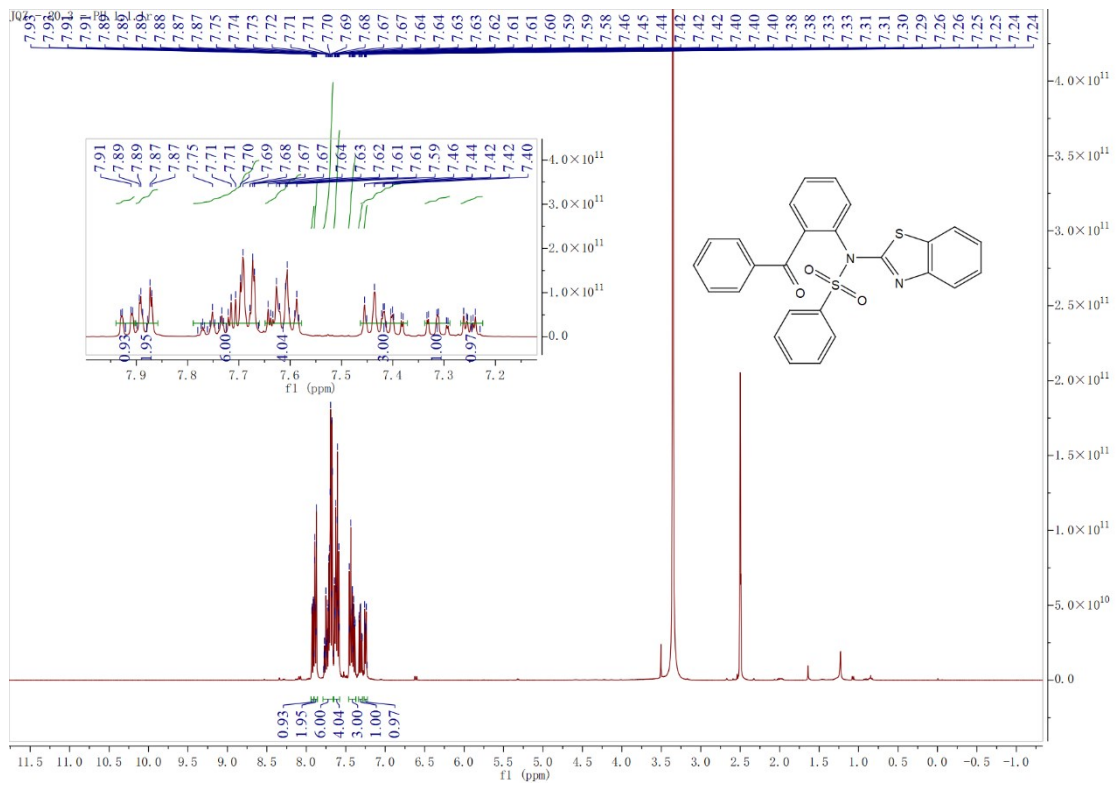



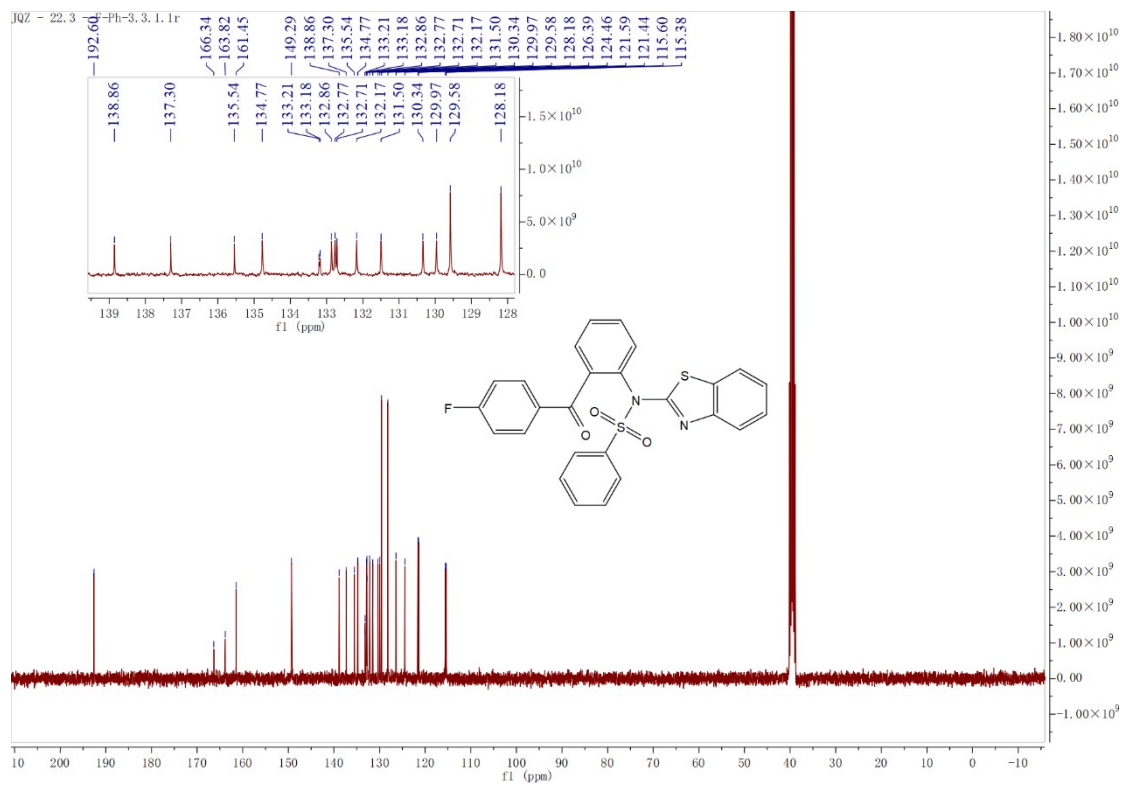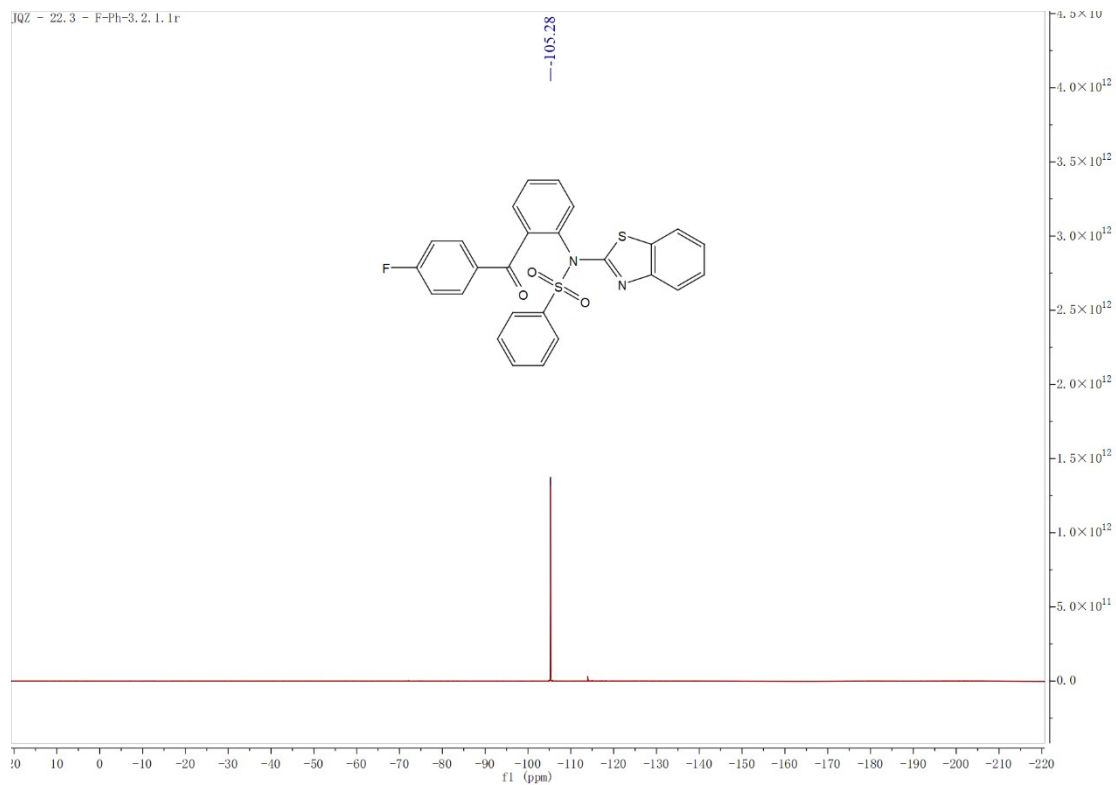

Supplement: d0ob01594f1.pdf [file d0ob01594f1.pdf]
